# Supplementary material for: A facile chemoenzymatic synthesis of SARS-CoV-2 glycopeptides for probing glycosylation functions
Source: Royal Society of Chemistry journal article supplement (doi:10.1039/d1cc02790e), 2021-01-01
Supplement: d1cc02790e1.pdf [file d1cc02790e1.pdf]

## Supporting Information

### A Facile Chemoenzymatic Synthesis of SARS-CoV-2 Glycopeptides for Probing Glycosylation Functions

Guanghai Zong,<sup>a</sup> Chao Li,<sup>a</sup> Sunaina Kiran Prabhu,<sup>a</sup> Roushu Zhang,<sup>a</sup> Xiao Zhang,<sup>a</sup> and Lai-Xi Wang<sup>\*a</sup>

<sup>a</sup> Department of Chemistry and Biochemistry, University of Maryland, College Park, Maryland 20742, United States

\* Corresponding author: [wang518@umd.edu](mailto:wang518@umd.edu)

### Table of Contents

|                                                                               |         |
|-------------------------------------------------------------------------------|---------|
| 1. General Procedures                                                         | S2      |
| 2. SPPS of SARS-CoV-2 GlcNAc-peptides (1-4)                                   | S3-S6   |
| 3. Preparation of Glycan Donors for Chemoenzymatic Reactions                  | S7-S8   |
| 4. Alfc E274A Catalyzed Core Fucosylation of SARS-CoV-2 GlcNAc-peptides (5-7) | S9-S12  |
| 5. Chemoenzymatic Synthesis of Glycopeptides (11-16)                          | S13-20  |
| 6. Biotinylation of (Glyco)peptides (18-24)                                   | S21-S28 |
| 7. Expression of mAb S309                                                     | S29-S30 |
| 8. Enzyme-linked immunosorbent assay (ELISA)                                  | S31     |
| 9. Surface Plasmon Resonance (SPR) Measurements                               | S32     |

## General Procedures.

Analytical reverse-phase HPLC was performed on a Waters Alliance® e2695 HPLC system equipped with a dual absorbance 2489 UV/Vis detector. Separations were performed using a C18 column (YMC-Triart C18, 4.6 × 250 mm, 5 μm) at a flow rate of 1 mL/min using a linear gradient of 10-50% MeCN containing 0.1% FA over 30 min. ESI-MS spectra were obtained using a Waters SQ Detector 2 single quadrupole mass spectrometer. MALDI-TOF analysis was performed using a Bruker UltrafleXtreme (UTX) mass spectrometer with TOF/TOF detection. Preparative RP-HPLC was performed on a Waters 600 HPLC system equipped with a dual absorbance UV detector using a C18 column (Waters-Symmetry Prep C18, 19 × 300 mm, 7 μm) at a flow-rate of 10 mL/min, or a C18 column (Waters XBridge, Prep Shield, 10 × 250 mm, 5 μm) at a flow-rate of 4 mL/min. The column was eluted using a linear gradient of 20-50% MeCN containing 0.1% FA over 30 min.

## General Procedure for SPPS of SARS-CoV-2 GlcNAc-peptides

Peptide synthesis was performed under microwave synthesis conditions using a CEM Liberty Blue microwave peptide synthesizer. Synthesis was based on Fmoc chemistry using Rink Amide resin (0.66 mmol/g) on a 0.1 mmol scale. Couplings were performed using 5 equiv of Fmoc-protected amino acids (or 3 equiv of glycosylamino acids), 5 equiv of DIC and 5 equiv of HOBT in DMF. Double couplings were performed at 45°C for 20 min (2×) for Fmoc-Cys(Trt)-OH, Fmoc-His(Trt)-OH and Fmoc-Arg(Pbf)-OH. The selectively protected glycosylamino acid building block Fmoc-Asn(Ac<sub>3</sub>GlcNAc)-OH (**S1**) was introduced at pre-determined sites and the coupling was performed at 45°C for 40 min. All other amino acids were coupled at 90 °C for 2 min. Fmoc deblocking was performed in 20% piperidine in DMF containing 0.1 M HOBT. The N-terminus was capped with an alkyne tag by treatment with 4-pentynoic acid following the same method as introduction of glycosylamino acid. After synthesis, the resin was washed with DMF (3×) and DCM (3×), dried. Resin cleavage and global peptide deprotection were achieved using freshly prepared cocktail R (TFA/Thioanisole/Ethanedithiol/Anisole [90/5/3/2]) and shaking for 2 h. The peptide was separated from the resin by filtration and the peptide was precipitated onto cold (-20°C) diethyl ether. A solution of the crude peptide in water (1 mg/mL) with 2.5% hydrazine was shaken at rt for 3 h to cyclize the peptide and/or remove the acetyl protecting group simultaneously. The crude peptides were purified by RP-HPLC and the purity and identity were confirmed by analytical HPLC and LC-MS analysis.

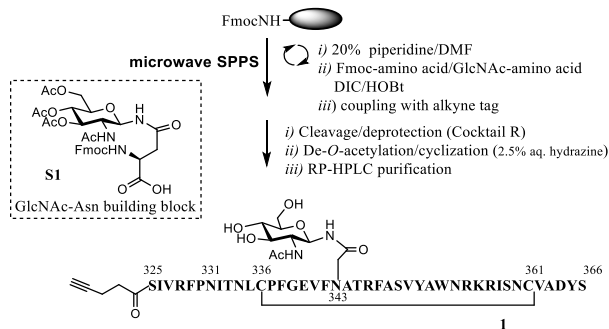

Scheme S1: SPPS of GlcNAc-peptide **1**

*GlcNAc-peptide 1* (42-mer-N343-GN). Analytical RP-HPLC,  $t_R = 18.43$  min. ESI-MS: calcd.,  $M = 5108.80$  (average isotopes); found, 858.91  $[M+K+5H]^{6+}$ , 1022.90  $[M+5H]^{5+}$ , 1278.31  $[M+4H]^{4+}$ , 1703.88  $[M+3H]^{3+}$ . Deconvolution mass, 5109.0.

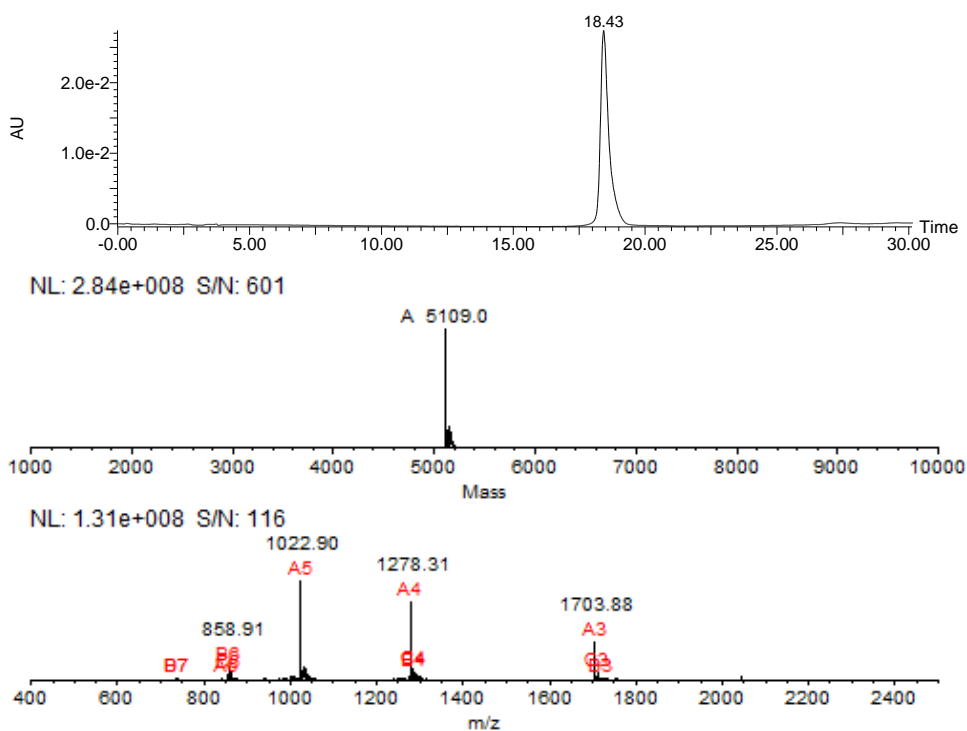

Figure S1. HPLC and ESI-MS profiles of GlcNAc-peptide **1**

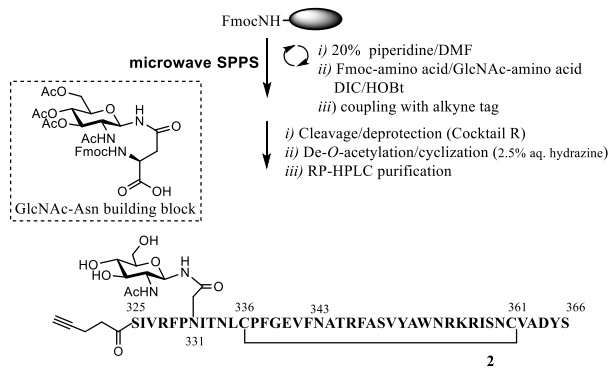

Scheme S2: SPPS of GlcNAc-peptide **2**

*GlcNAc-peptide 2* (42-mer-N331-GN). Analytical RP-HPLC,  $t_R = 18.63$  min. ESI-MS: calcd.,  $M = 5108.80$  (average isotopes); found,  $858.97 [M+K+5H]^{6+}$ ,  $1022.65 [M+5H]^{5+}$ ,  $1278.24 [M+4H]^{4+}$ ,  $1704.00 [M+3H]^{3+}$ . Deconvolution mass, 5109.0.

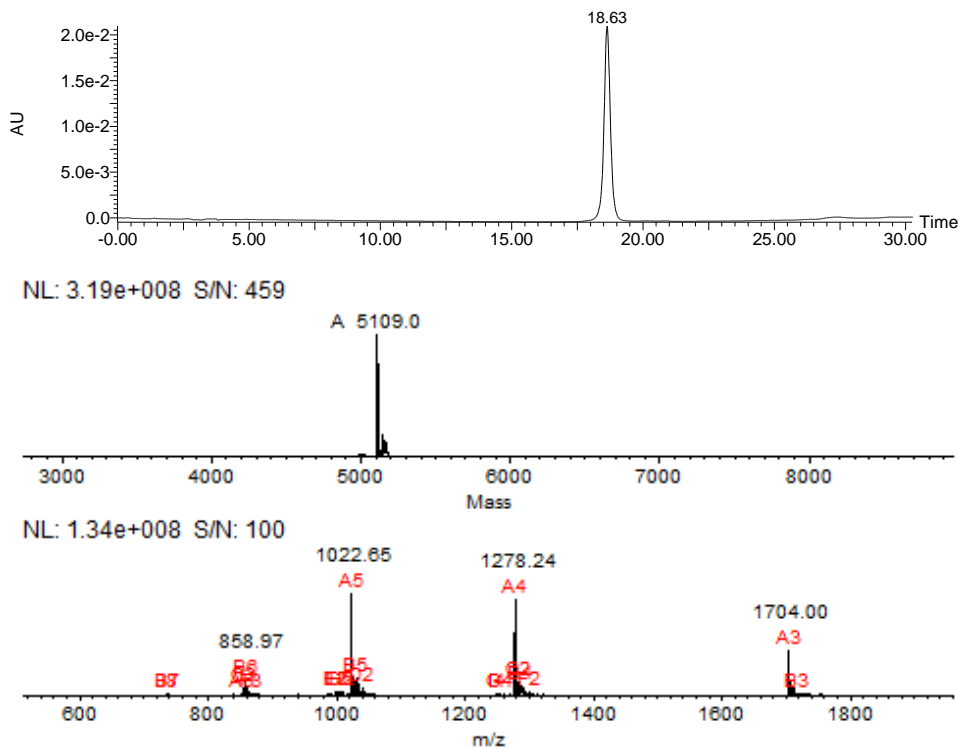

Figure S2. HPLC and ESI-MS profiles of GlcNAc-peptide **2**

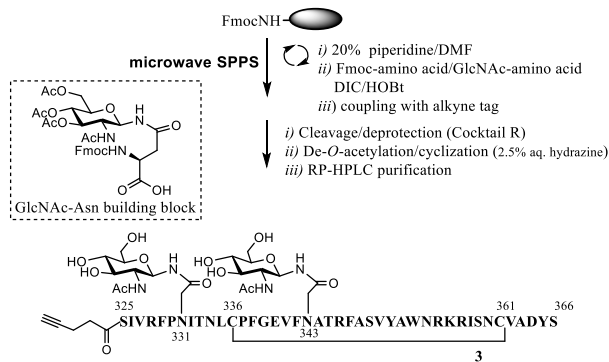

**Scheme S3: SPPS of GlcNAc-peptide 3**

*GlcNAc-peptide 3* (42-mer-N331-GN, N343-GN). Analytical RP-HPLC,  $t_R = 18.12$  min. ESI-MS: calcd.,  $M = 5311.99$  (average isotopes); found, 892.74  $[M+K+5H]^{6+}$ , 1063.41  $[M+5H]^{5+}$ , 1329.08  $[M+4H]^{4+}$ , 1771.67  $[M+3H]^{3+}$ . Deconvolution mass, 5311.8.

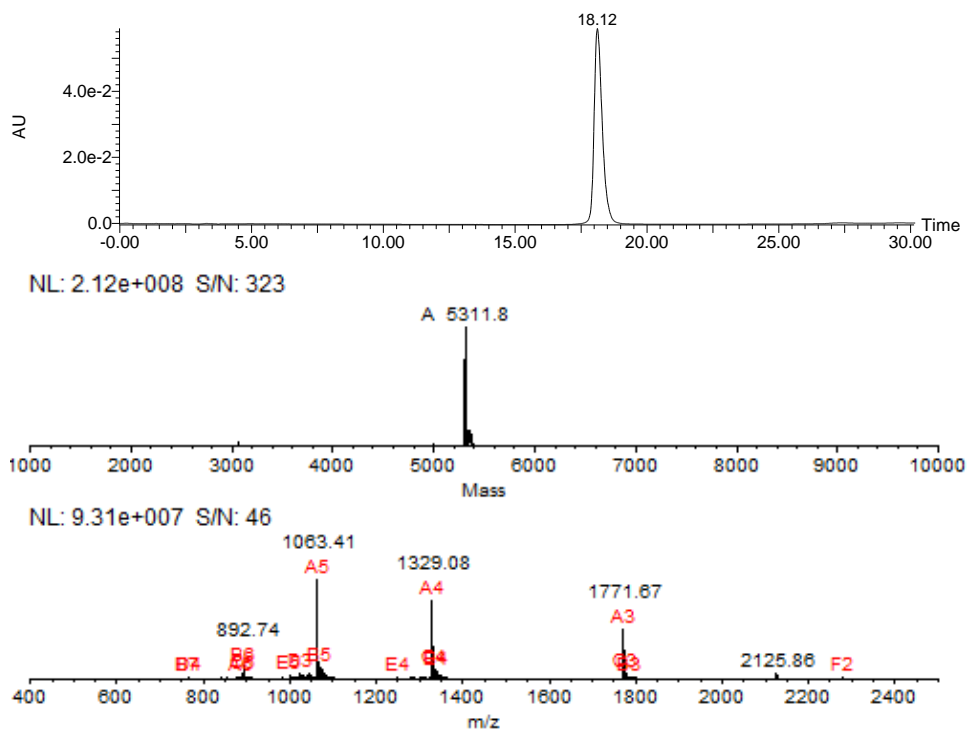

**Figure S3. HPLC and ESI-MS profiles of GlcNAc-peptide 3**

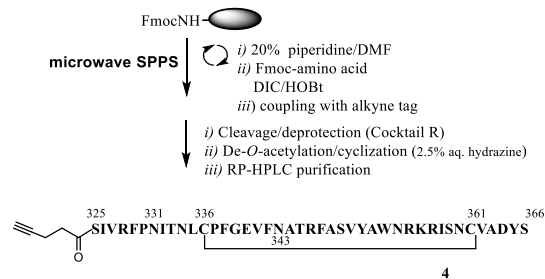

Scheme S4: SPPS of GlcNAc-peptide 4

*Peptide 4* (42-mer). Analytical RP-HPLC,  $t_R = 18.93$  min. ESI-MS: calcd.,  $M = 4905.60$  (average isotopes); found, 825.20  $[M+K+5H]^{6+}$ , 982.01  $[M+5H]^{5+}$ , 1227.21  $[M+4H]^{4+}$ , 1636.34  $[M+3H]^{3+}$ . Deconvolution mass, 4905.2.

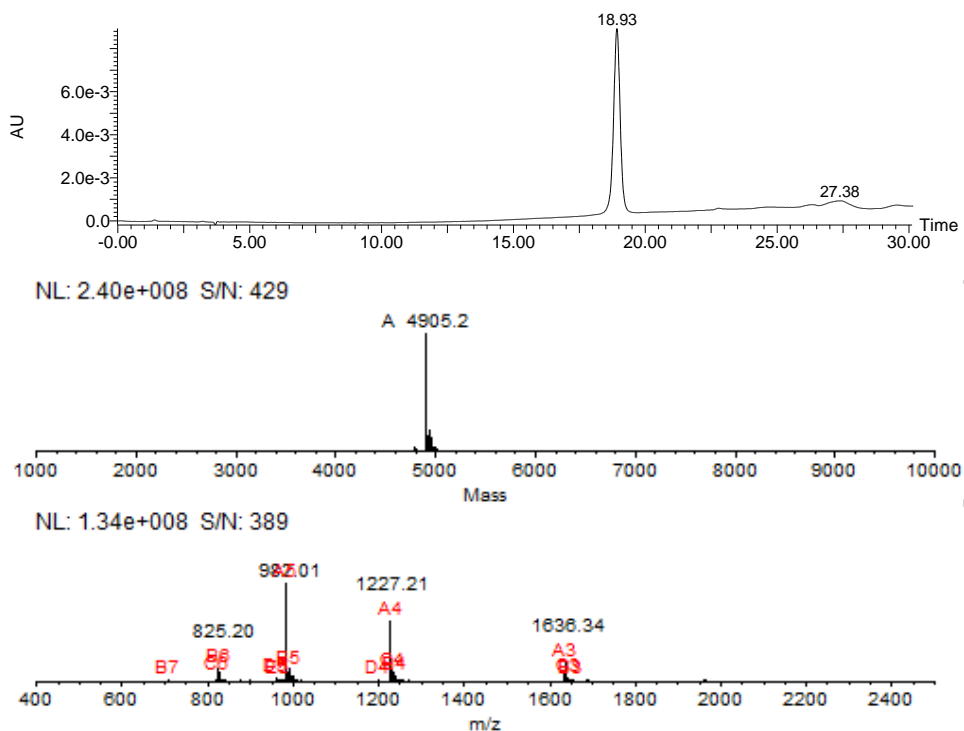

Figure S4. HPLC and ESI-MS profiles of peptide 4

## Preparation of Glycan Donors for Chemoenzymatic Reactions.

$\alpha$ -L-Fucosyl fluoride (**S2**) was synthesized over a three-step conversion from  $\alpha$ -L-fucose following the literature reported procedure.<sup>1</sup>

High-mannose-type N-glycan (Man5GlcNAc) was prepared by Endo-A-catalyzed hydrolysis of soybean agglutinin (SBA) isolated from soybean flour followed by  $\alpha$ 1,2-mannosidase digestion.<sup>2</sup> The obtained glycan were converted into Man5-oxazoline following the previous method using DMC in the presence of triethylamine.<sup>3</sup>

Galactosylated biantennary complex-type N-glycan (G2GlcNAc) prepared by Endo-S2-catalyzed hydrolysis of sialylglycopeptides (SGP) isolated from egg yolk powder<sup>4</sup> followed by neuraminidase digestion. The obtained glycan was converted into G2-oxazoline following the previous method using DMC in the presence of triethylamine.<sup>3</sup>

For the synthesis of degalactosylated biantennary complex-type N-glycan (G0GlcNAc)-oxazoline (**8**), a solution of SGP (200 mg) was dissolved in 4 mL PBS buffer (100 mM, pH = 7.4). Endo-S2 (final concentration of 0.1 mg/mL), neuraminidase (final concentration of 0.05 mg/mL) and  $\beta$ 1,4-galactosidase (final concentration of 0.05 mg/mL) were added sequentially to the solution. The solution was incubated at 30 °C until LC-MS showed each step was complete. The enzymes were then deactivated at 95 °C for 3 min. The crude G0 glycan was purified by gel filtration on a Sephadex G-10 (GE Healthcare) column to remove hydrolyzed monosaccharides followed by cation exchange chromatography (HiTrap SP HP) to remove the cleaved peptides to give pure G0GlcNAc (66 mg, 85% over all steps). The G0-oxazoline (**8**) was prepared by treatment of a solution of G0GlcNAc (50 mg, 45  $\mu$ mol) in water (1 mL) with triethylamine (2.2 mmol) and 2-chloro-1,3- dimethylimidazolinium chloride (DMC) (1.1 mmol) on ice for 30 min. The glycan oxazoline product was purified by gel filtration on a Sephadex G-10 column eluting with 0.1% triethylamine. The carbohydrate containing fractions were pooled and lyophilized to give **8** (45.8 mg, 93%).<sup>1</sup>H NMR (600 MHz, D<sub>2</sub>O)  $\delta$  6.05 (d,  $J$  = 7.2 Hz, H-1-GlcNAc-Ox), 5.07 (s, 1H), 4.90 (s, 1H), 4.70 (s, 1H), 4.54 (d,  $J$  = 8.4 Hz), 4.51 (d,  $J$  = 8.4 Hz), 4.36 – 4.35 (m, 1H), 4.18 – 4.10 (m, 4H), 3.95 – 3.82 (m, 10H), 3.77 – 3.35 (m, 34H), 2.05 – 1.98 (m, 9H). <sup>13</sup>C NMR (150 MHz, D<sub>2</sub>O)  $\delta$  174.3, 174.2, 168.1, 100.9, 99.5, 99.1, 99.0, 96.1, 95.9, 79.9, 77.4, 76.0, 75.6, 75.3, 73.8, 73.0, 72.8, 72.7, 72.4, 70.4, 69.8, 69.7, 69.39, 69.0, 68.9, 68.7, 68.1, 66.8, 65.3, 65.2, 64.7, 62.8, 61.1, 60.1, 54.8, 51.8, 48.8, 38.9, 35.3, 21.8, 21.6, 12.5. HRMS (ESI-TOF)  $m/z$  [M+H]<sup>+</sup> Calcd for C<sub>42</sub>H<sub>70</sub>N<sub>3</sub>O<sub>30</sub><sup>+</sup>: 1096.4039, found: 1096.4025.

### 1H NMR spectrum of G0-Oxazoline 8

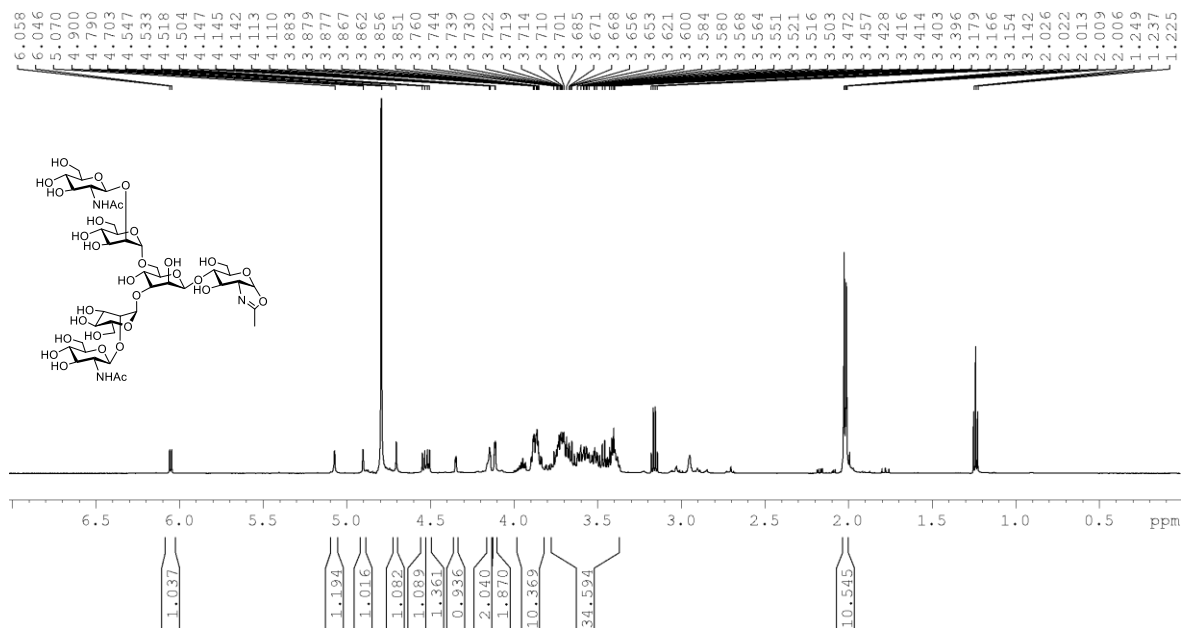

### 13C and 135DEPT NMR spectrum of G0-Oxazoline 8

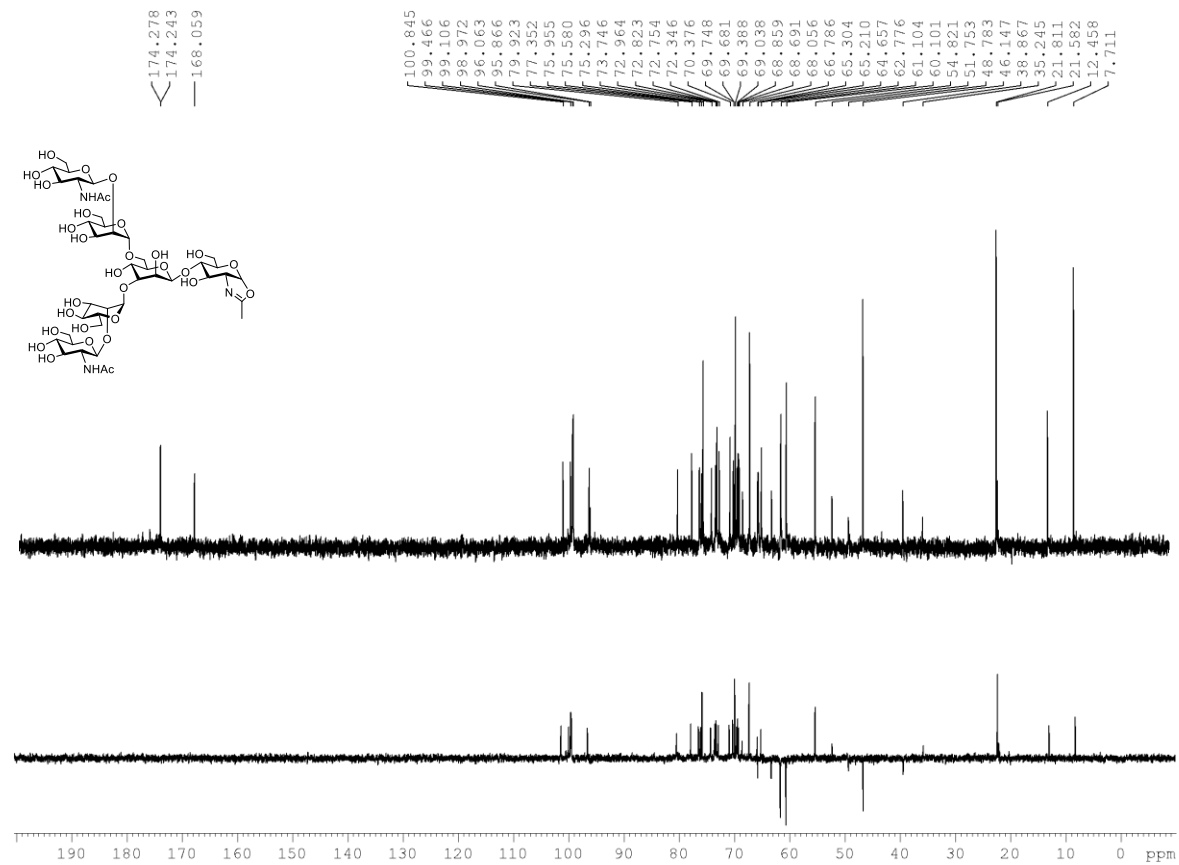



**General Procedure for AlfC E274A Catalyzed Core Fucosylation of SARS-CoV-2 GlcNAc-peptides.**

A solution of GlcNAc-peptide (1  $\mu\text{mol}$ ) and  $\alpha$ -fucosyl fluoride (5  $\mu\text{mol}$ ) in phosphate buffer (50 mM, pH 7.4, 1 mL) was incubated with AlfC mutant E274A (final concentration, 0.2 mg/mL) at 42 °C. The reaction was monitored by RP-HPLC-MS. After 30 min, the reaction was quenched with 0.1% aq. TFA. The mixture was centrifuged and filtered through a 0.45  $\mu\text{m}$  syringe filter. The filtrate was purified by RP-HPLC to give fucosylated GlcNAc-peptide.

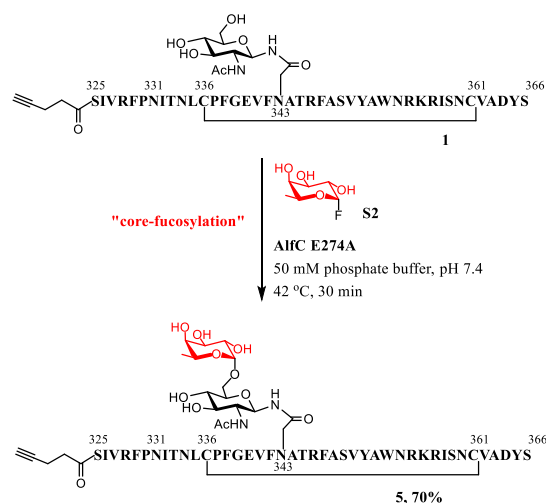

Scheme S5: AlfC E274A Catalyzed Core Fucosylation of GlcNAc-peptide **5**

*Fucosylated GlcNAc-peptide 5 (42-mer-N343-GN-F)*. GlcNAc-peptide **1** (10 mg, 2.0  $\mu\text{mol}$ ) was converted to 7.2 mg fucosylated GlcNAc-peptide **5** (yield, 70%). Analytical RP-HPLC,  $t_R = 18.35$  min. ESI-MS: calcd.,  $M = 5254.94$  (average isotopes); found, 1052.26  $[\text{M}+5\text{H}]^{5+}$ , 1314.91  $[\text{M}+4\text{H}]^{4+}$ , 1752.83  $[\text{M}+3\text{H}]^{3+}$ . Deconvolution mass, 5255.4.

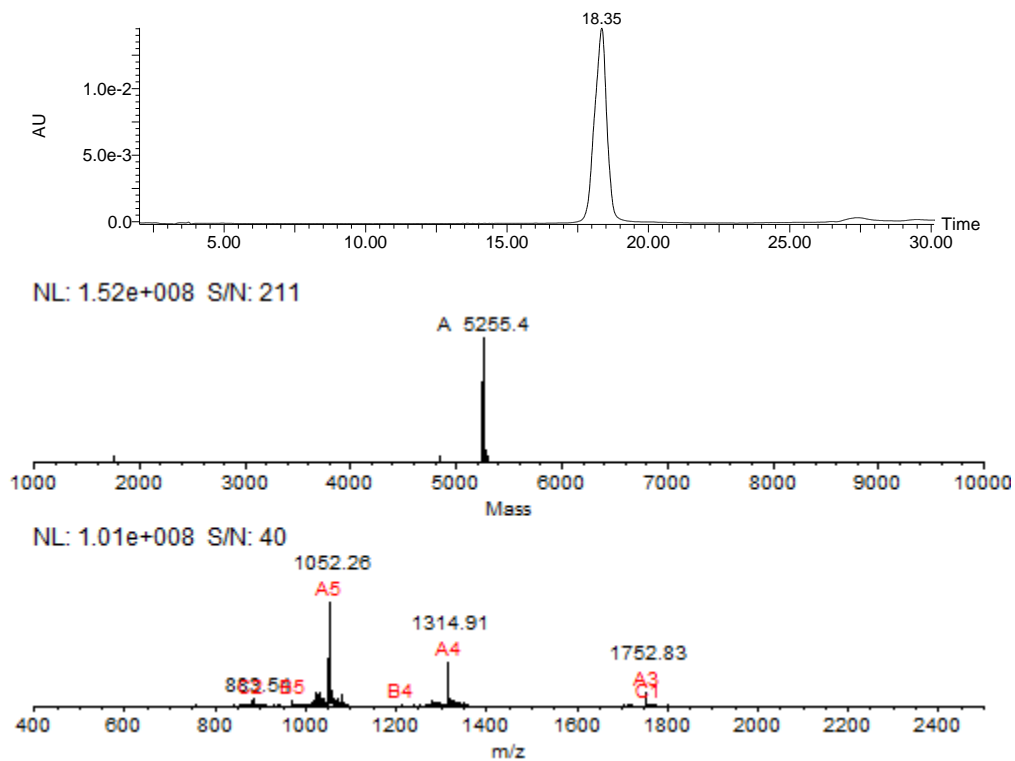

Figure S5. HPLC and ESI-MS profiles of peptide **5**

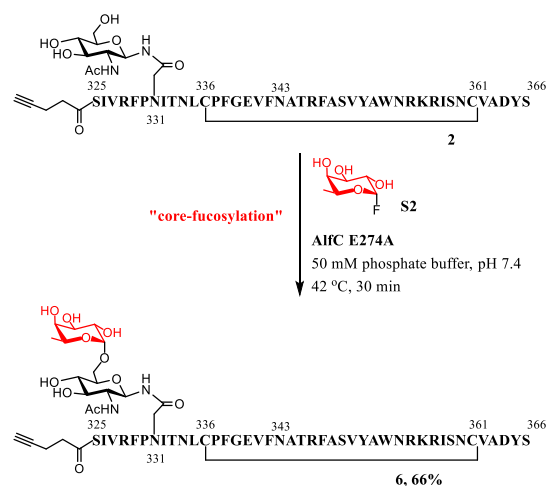

Scheme S6. AlfC E274A Catalyzed Core Fucosylation of GlcNAc-peptide **6**

*Fucosylated GlcNAc-peptide 6 (42-mer-N331-GN-F)*. GlcNAc-peptide **2** (2.5 mg, 0.5  $\mu\text{mol}$ ) was converted to 1.7 mg fucosylated GlcNAc-peptide **6** (yield, 66%). Analytical RP-HPLC,  $t_R = 18.6$  min. ESI-MS: calcd.,  $M = 5254.94$  (average isotopes); found, 1052.13  $[\text{M}+5\text{H}]^{5+}$ , 1314.91  $[\text{M}+4\text{H}]^{4+}$ , 1752.39  $[\text{M}+3\text{H}]^{3+}$ . Deconvolution mass, 5255.4.

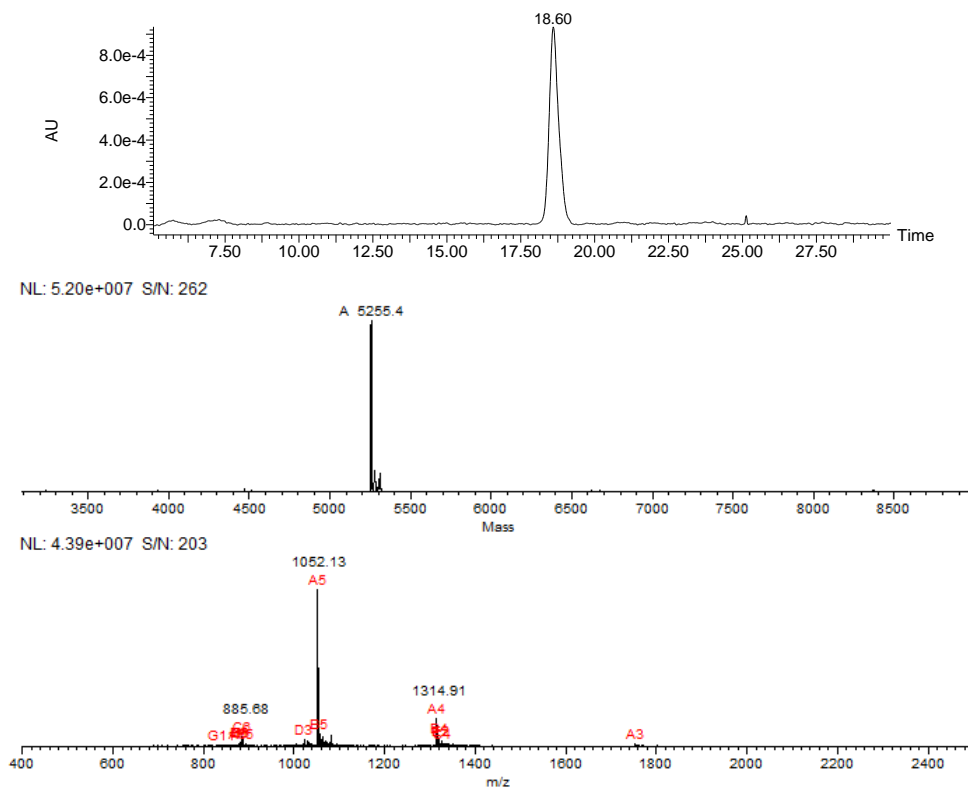

Figure S6. HPLC and ESI-MS profiles of core fucosylated GlcNAc-peptide **6**

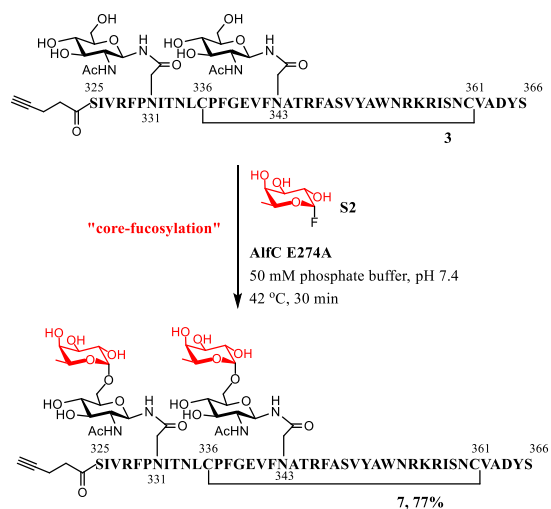

Scheme S7. AlfC E274A Catalyzed Core Fucosylation of GlcNAc-peptide 7

*Fucosylated GlcNAc-peptide 7 (42-mer-N331-GN-F, N343-GN-F)*. GlcNAc-peptide **3** (5.4 mg, 1.0  $\mu\text{mol}$ ) was converted to 4.4 mg fucosylated GlcNAc-peptide **7** (yield, 77%). Analytical RP-HPLC,  $t_R = 17.92$  min. ESI-MS: calcd.,  $M = 5604.28$  (average isotopes); found, 941.76  $[\text{M}+\text{K}+5\text{H}]^{6+}$ , 1121.94  $[\text{M}+5\text{H}]^{5+}$ , 1402.10  $[\text{M}+4\text{H}]^{4+}$ , 1869.00  $[\text{M}+3\text{H}]^{3+}$ . Deconvolution mass, 5604.4.

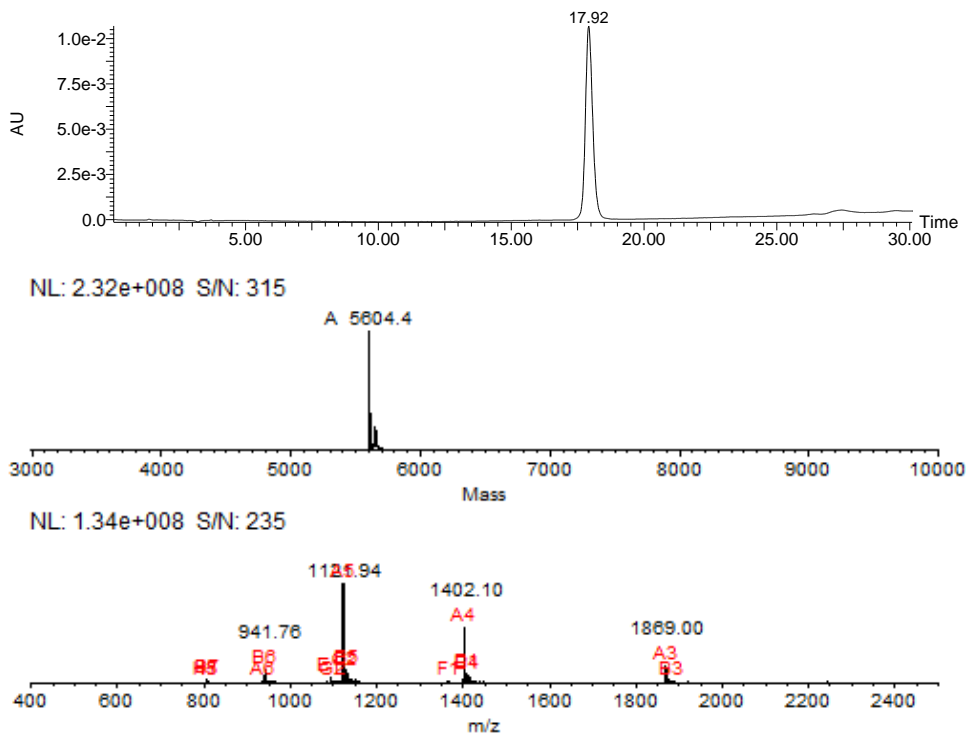

Figure S7. HPLC and ESI-MS profiles of core fucosylated GlcNAc-peptide 7

**General Procedure for Endo-F3 D165A Catalyzed transglycosylation of Fucosylated SARS-CoV-2 GlcNAc-peptides.**

A solution of fucosylated GlcNAc-peptide (1  $\mu\text{mol}$ ) and G0-oxazoline (**8**, 3  $\mu\text{mol}$ ) or G2-oxazoline (**9**, 3  $\mu\text{mol}$ ) in Tris buffer (50 mM, pH 7.4, 0.5 mL) was incubated with Endo-F3 mutant D165A (final concentration, 0.2 mg/mL) at 37 °C. The reaction was monitored by RP-HPLC-MS. After 1 h, the reaction was quenched with 0.1% aq. TFA. The mixture was centrifuged and filtered through a 0.45  $\mu\text{m}$  syringe filter. The filtrate was purified by RP-HPLC to give fucosylated glycopeptide.

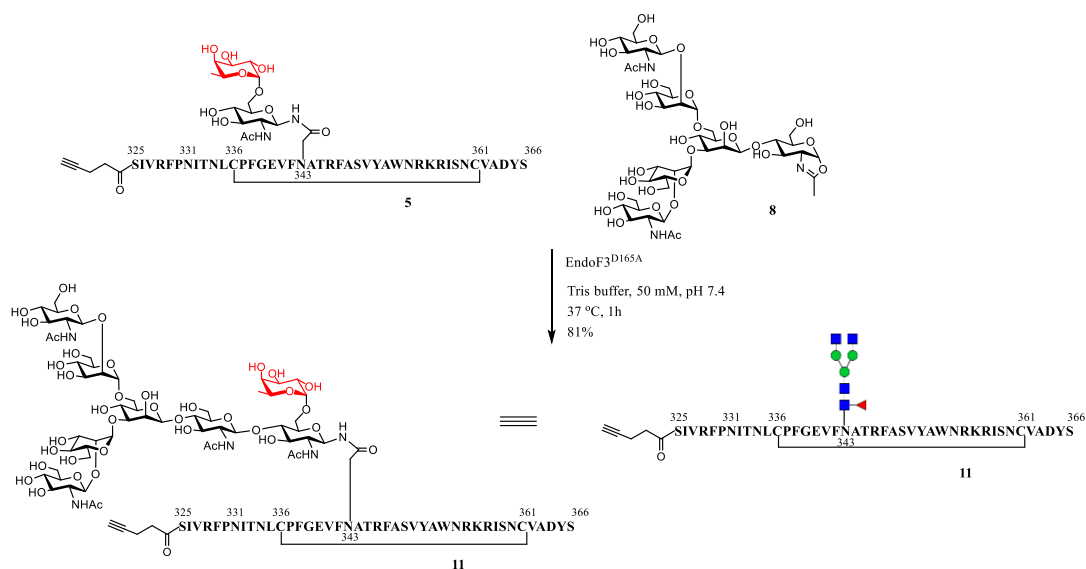

Scheme S8. Chemoenzymatic synthesis of glycopeptide **11**

*Fucosylated Glycopeptide 11* (42-mer-N343-GN-F-G0). Fucosylated GlcNAc-peptide **5** (7.0 mg, 1.3  $\mu\text{mol}$ ) was converted to 6.9 mg fucosylated glycopeptide **11** (yield, 81%). Analytical RP-HPLC,  $t_R = 18.15$  min. ESI-MS: calcd.,  $M = 6350.94$  (average isotopes); found, 1271.31  $[\text{M}+5\text{H}]^{5+}$ , 1588.77  $[\text{M}+4\text{H}]^{4+}$ , 2117.99  $[\text{M}+3\text{H}]^{3+}$ . Deconvolution mass, 6351.4.

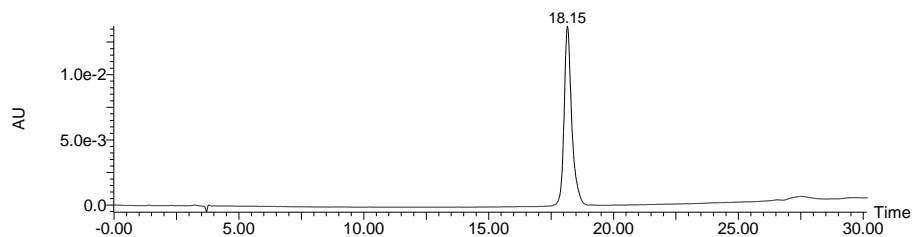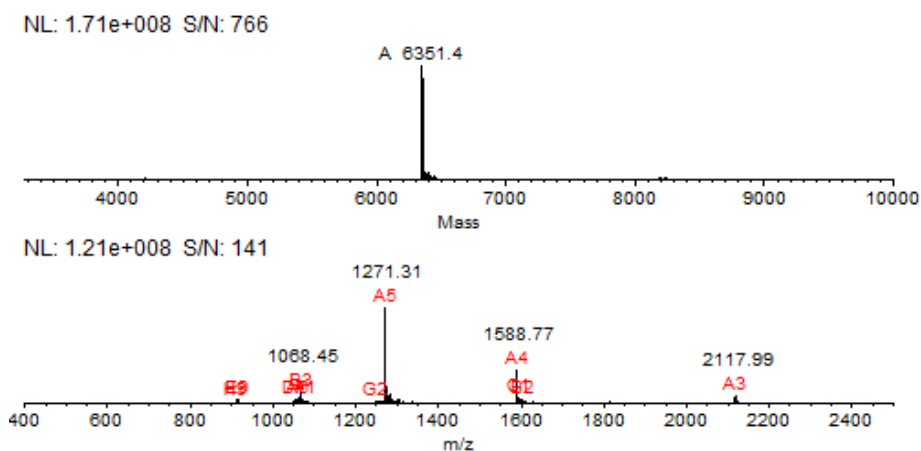

Figure S8. HPLC and ESI-MS profiles of core fucosylated glycopeptide **11**

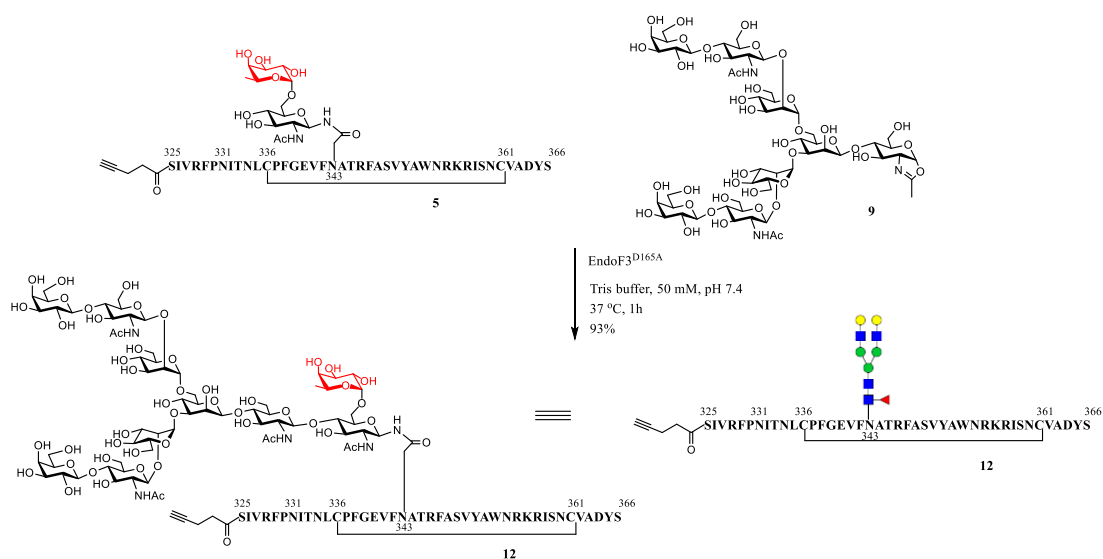

### Scheme S9. Chemoenzymatic synthesis of glycopeptide **12**

*Fucosylated Glycopeptide 12* (42-mer-N343-GN-F-G2). Fucosylated GlcNAc-peptide **5** (1.7 mg, 0.32  $\mu\text{mol}$ ) was converted to 2.0 mg fucosylated glycopeptide **12** (yield, 93%). Analytical RP-HPLC,  $t_R = 17.97$  min. ESI-MS: calcd.,  $M = 6675.23$  (average isotopes); found, 1122.51  $[\text{M}+\text{Na}+\text{K}+4\text{H}]^{6+}$ , 1335.89  $[\text{M}+5\text{H}]^{5+}$ , 1669.98  $[\text{M}+4\text{H}]^{4+}$ , 2225.97  $[\text{M}+3\text{H}]^{3+}$ . Deconvolution mass, 6674.9.

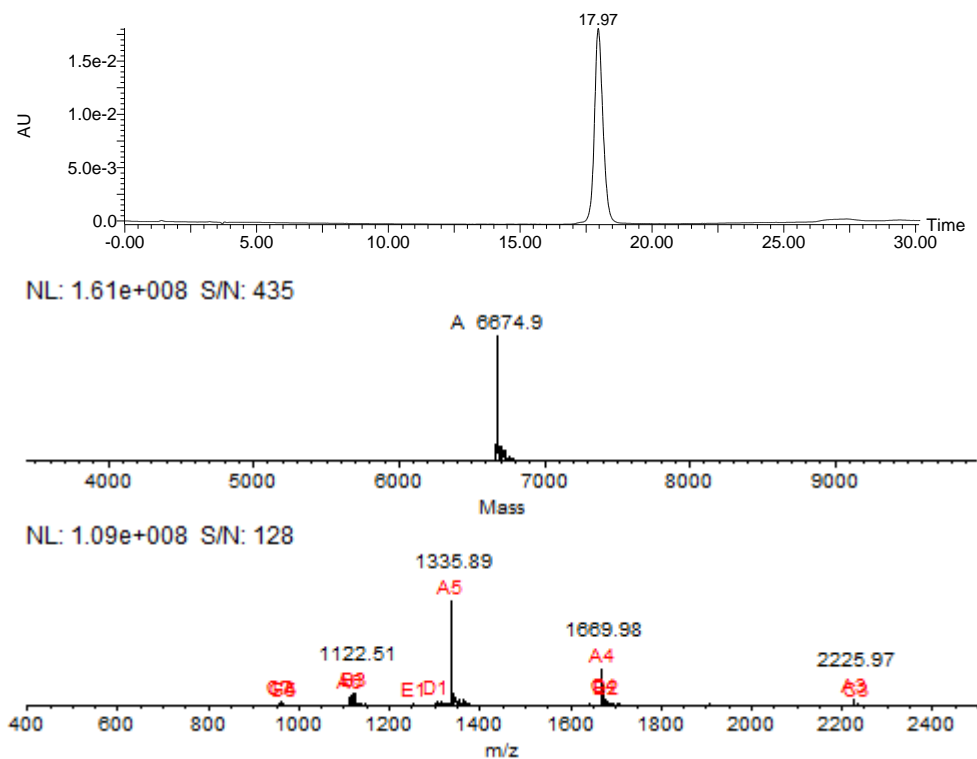

Figure S9. HPLC and ESI-MS profiles of core fucosylated glycopeptide **12**

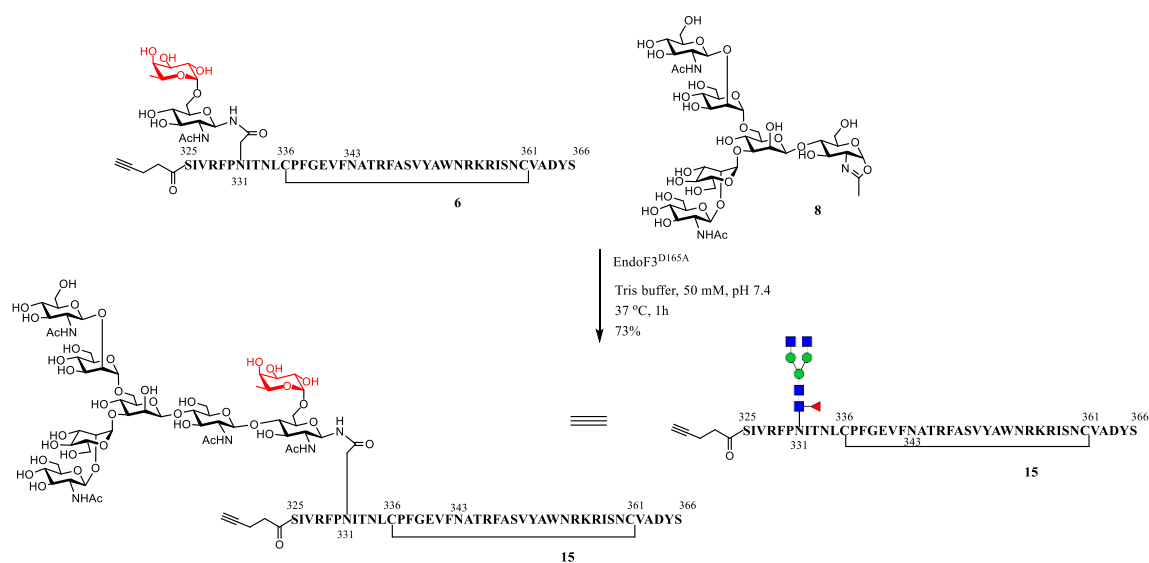

Scheme S10. Chemoenzymatic synthesis of glycopeptide **15**

*Fucosylated Glycopeptide 15 (42-mer-N331-GN-F-GO)*. Fucosylated GlcNAc-peptide **6** (1.5 mg, 0.29  $\mu\text{mol}$ ) was converted to 1.4 mg fucosylated glycopeptide **15** (yield, 77%). Analytical RP-HPLC,  $t_R = 18.17$  min. ESI-MS: calcd.,  $M = 6350.94$  (average isotopes); found, 1066.18  $[\text{M}+\text{K}+5\text{H}]^{6+}$ , 1271.00  $[\text{M}+5\text{H}]^{5+}$ , 1588.65  $[\text{M}+4\text{H}]^{4+}$ , 2117.86  $[\text{M}+3\text{H}]^{3+}$ . Deconvolution mass, 6350.9.

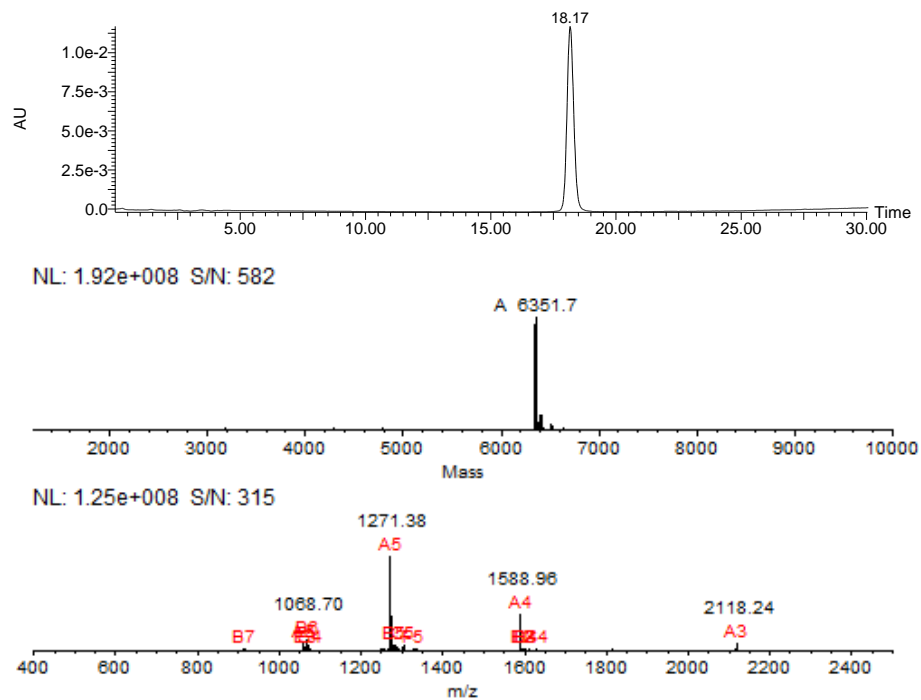

Figure S10. HPLC and ESI-MS profiles of core fucosylated glycopeptide **15**



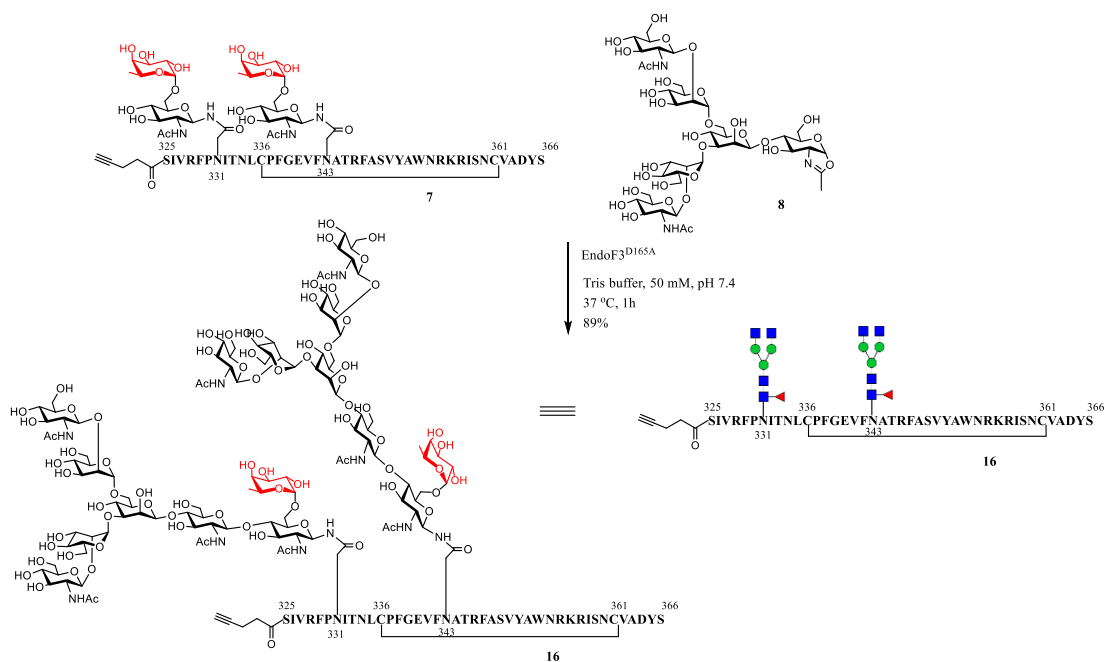

### Scheme S11. Chemoenzymatic synthesis of glycopeptide **16**

*Fucosylated Glycopeptide 16* (42-mer-N331-GN-F-G0, N343-GN-F-G0). Fucosylated GlcNAc-peptide **7** (3.0 mg, 0.54  $\mu\text{mol}$ ) was converted to 3.3 mg fucosylated glycopeptide **7** (yield, 79%). Analytical RP-HPLC,  $t_R = 17.37$  min. ESI-MS: calcd.,  $M = 7796.29$  (average isotopes); found, 1120.36  $[\text{M}+\text{K}+6\text{H}]^{7+}$ , 1300.55  $[\text{M}+6\text{H}]^{6+}$ , 1560.11  $[\text{M}+5\text{H}]^{5+}$ , 1949.96  $[\text{M}+4\text{H}]^{4+}$ . Deconvolution mass, 7796.1.

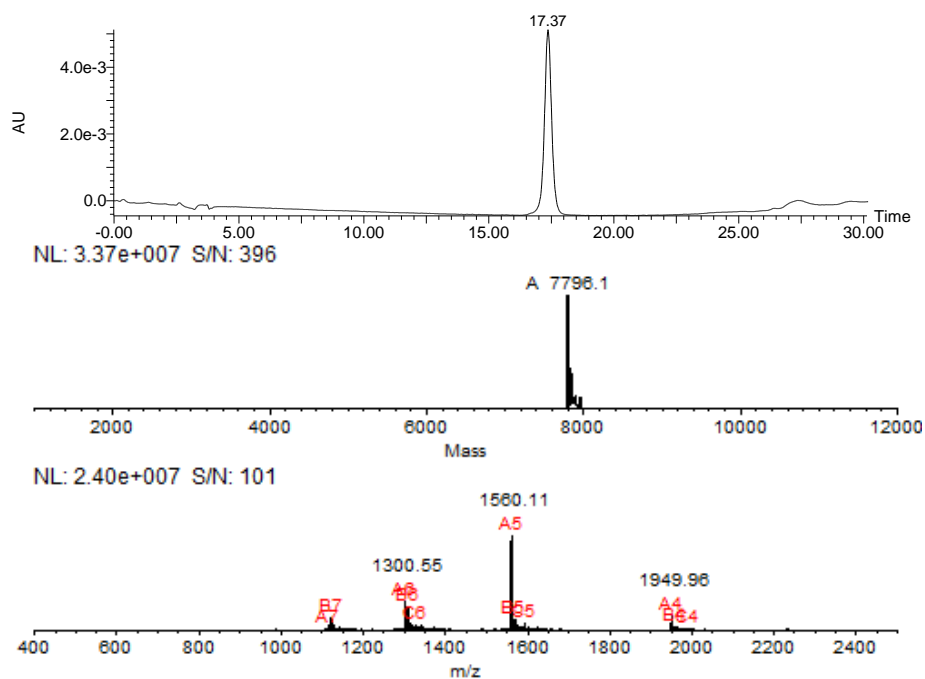

Figure S11. HPLC and ESI-MS profiles of core fucosylated glycopeptide **16**

**General Procedure for EndoM-N175Q Catalyzed transglycosylation of SARS-CoV-2 GlcNAc-peptides.**

A solution of GlcNAc-peptide (1  $\mu\text{mol}$ ) and glycan oxazoline (3  $\mu\text{mol}$ ) in a phosphate buffer (50 mM, pH 7.4, 0.5 mL) was incubated with EndoM mutant N175Q (final concentration, 0.1 mg/mL) at 30 °C. The reaction was monitored by RP-HPLC-MS. After 2 h, the reaction was quenched with 0.1% aq. TFA. The mixture was centrifuged and filtered through a 0.45  $\mu\text{m}$  syringe filter. The filtrate was purified by RP-HPLC to give glycosylated peptide.

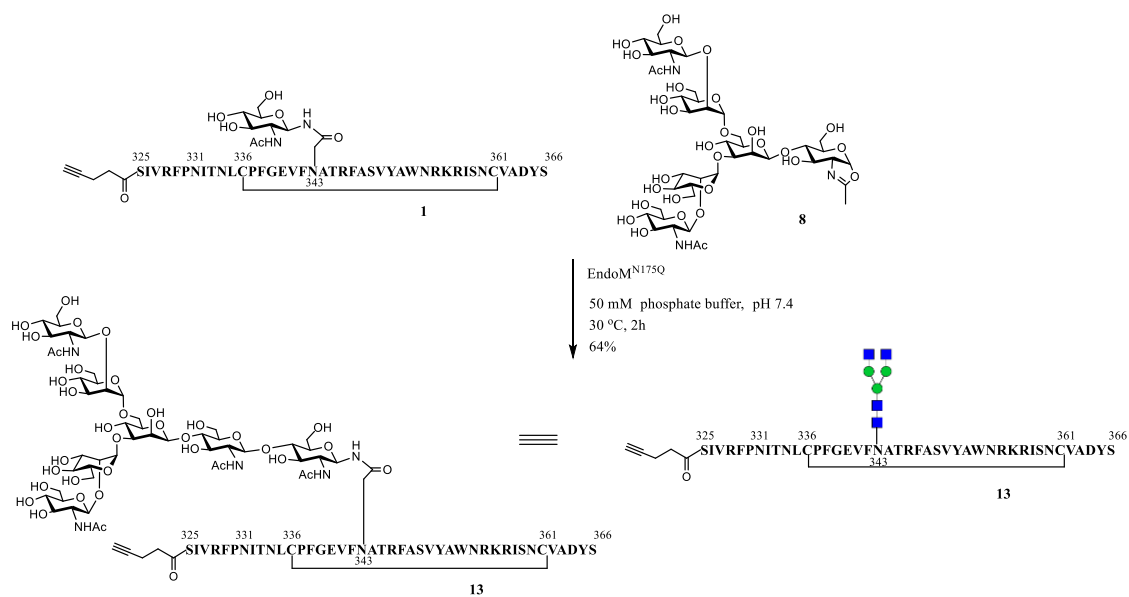

### Scheme S12. Chemoenzymatic synthesis of glycopeptide **13**

*Fucosylated Glycopeptide 13 (42-mer-N343-GN-G0)*. GlcNAc-peptide **1** (4.0 mg, 0.78  $\mu\text{mol}$ ) was converted to 3.1 mg glycopeptide **13** (yield, 64%). Analytical RP-HPLC,  $t_R = 18.10$  min. ESI-MS: calcd.,  $M = 6204.80$  (average isotopes); found, 1242.02  $[M+5H]^5+$ , 1552.11  $[M+4H]^4+$ , 2068.91  $[M+3H]^3+$ . Deconvolution mass, 6204.3.

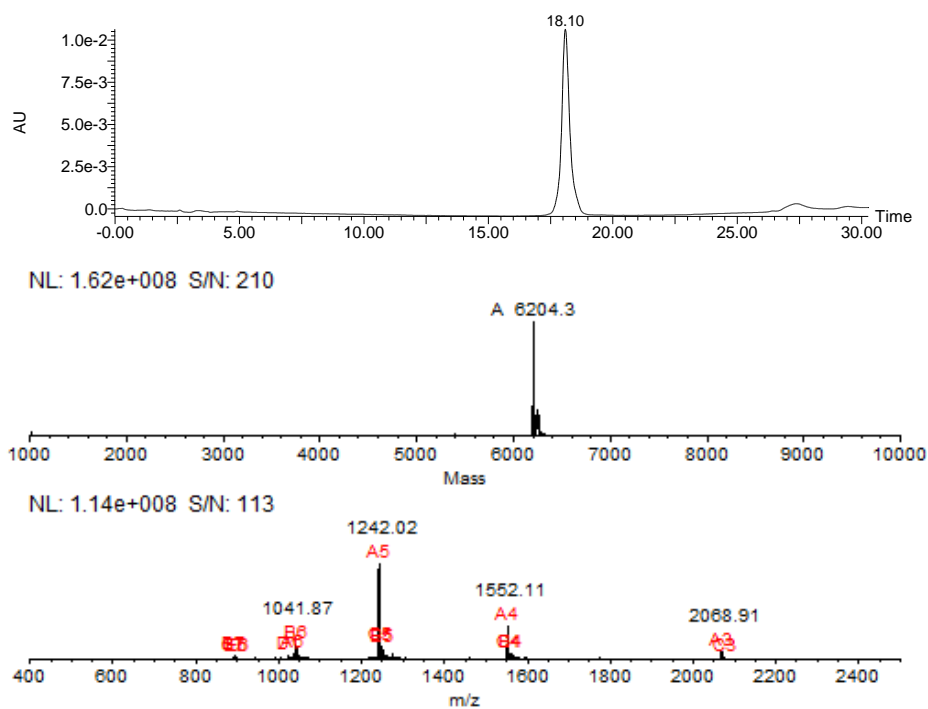

Figure S12. HPLC and ESI-MS profiles of core fucosylated glycopeptide **13**

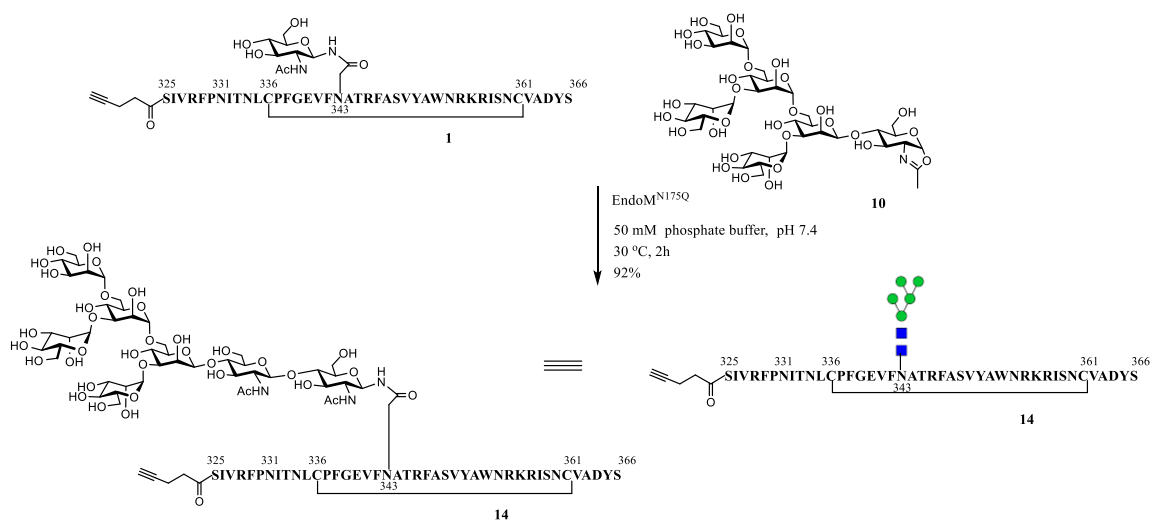

Scheme S13. Chemoenzymatic synthesis of glycopeptide **14**

*Fucosylated Glycopeptide 14* (42-mer-N343-GN-Man5). GlcNAc-peptide **1** (4.0 mg, 0.78  $\mu\text{mol}$ ) was converted to 4.4 mg glycopeptide **14** (yield, 92%). Analytical RP-HPLC,  $t_R = 18.07$  min. ESI-MS: calcd.,  $M = 6122.70$  (average isotopes); found, 1027.69  $[\text{M}+\text{K}+5\text{H}]^{6+}$ , 1225.51  $[\text{M}+5\text{H}]^{5+}$ , 1531.69  $[\text{M}+4\text{H}]^{4+}$ , 2041.88  $[\text{M}+3\text{H}]^{3+}$ . Deconvolution mass, 6122.8.

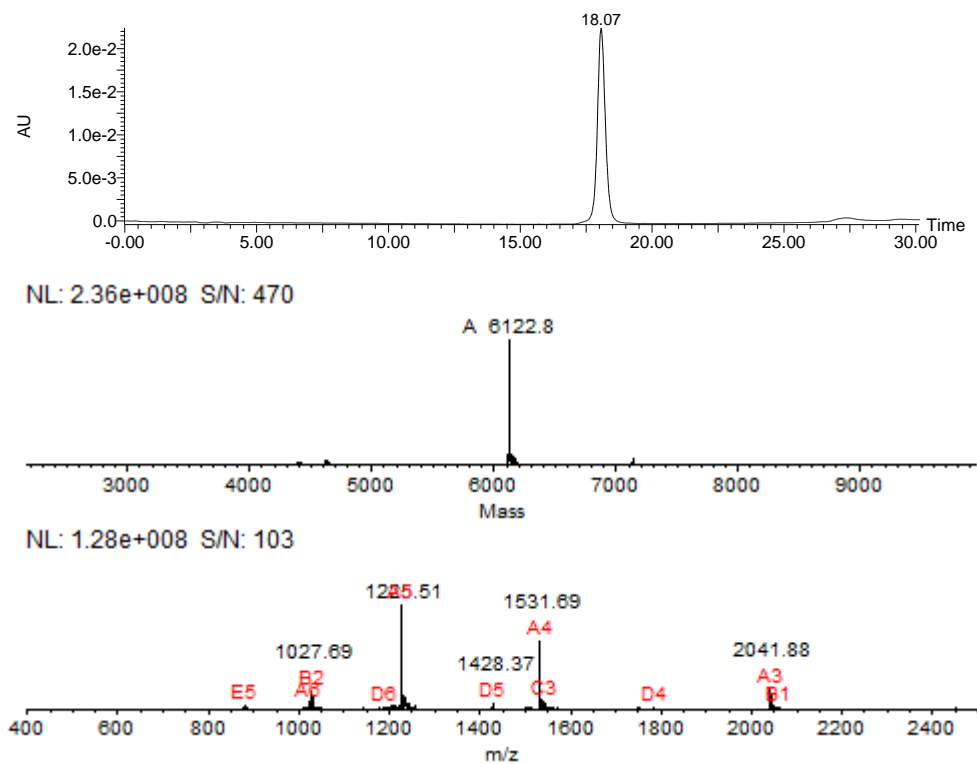

Figure S13. HPLC and ESI-MS profiles of core fucosylated glycopeptide **14**

**General procedure for preparation of biotinylated glycopeptides:**

To a solution of (glyco)peptide **4**, **11-16** (0.2 mg) and biotin-(PEG)<sub>4</sub>-N<sub>3</sub> (**17**, 2 equiv) in a mixture of water/DMSO (9:1, v/v, 0.1 mL) was added an aqueous solution of CuSO<sub>4</sub> (0.2 equiv), THPTA (0.2 equiv) and sodium ascorbate (2 equiv) and the mixture was incubated at 37 °C in dark. The reaction was monitored by RP-HPLC-MS. After 6 h, the reaction was diluted with water (2 mL) and filtered through a 0.45 μm syringe filter. The filtrate was purified by RP-HPLC to give biotinylated glycopeptide.

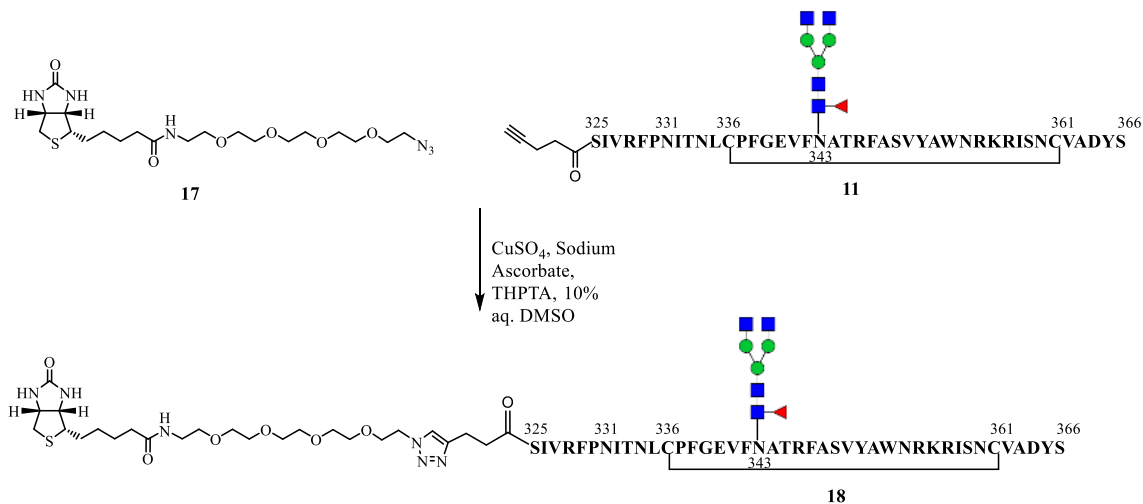

Scheme S14. Synthesis of biotinylated glycopeptide **18**

*Biotinylated glycopeptide 18 (Biotin-42-mer-N343-GN-F-G0)*. Glycopeptide **11** (0.20 mg, 0.031  $\mu\text{mol}$ ) was converted to 0.18 mg biotinylated glycopeptide **18** (yield, 84%). Analytical RP-HPLC,  $t_R = 18.13$  min. ESI-MS: calcd.,  $M = 6839.55$  (average isotopes); found, 1141.22  $[\text{M}+6\text{H}]^{6+}$ , 1369.22  $[\text{M}+5\text{H}]^{5+}$ , 1711.37  $[\text{M}+4\text{H}]^{4+}$ . Deconvolution mass, 6841.3.

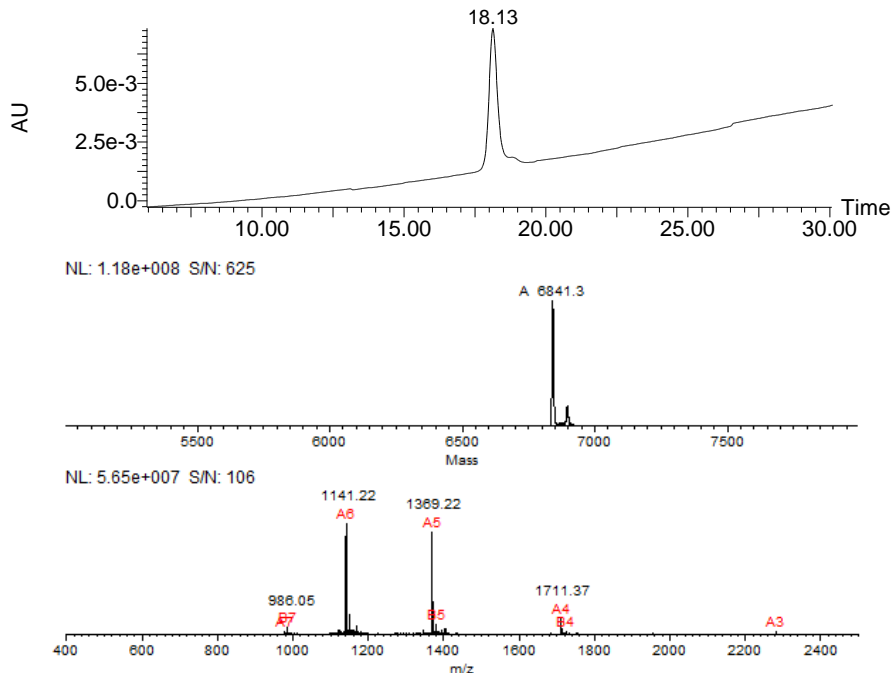

Figure S14. HPLC and ESI-MS profiles of biotinylated glycopeptide **18**

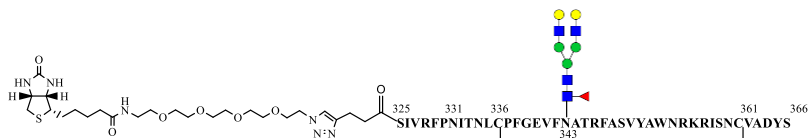

### Biotinylated glycopeptide **19**

Biotinylated glycopeptide **19** (Biotin-42-mer-N343-GN-F-G2). Glycopeptide **12** (0.20 mg, 0.030  $\mu\text{mol}$ ) was converted to 0.18 mg biotinylated glycopeptide **19** (yield, 84%). Analytical RP-HPLC,  $t_R = 18.05$  min. ESI-MS: calcd.,  $M = 7163.83$  (average isotopes); found, 1195.27  $[\text{M}+6\text{H}]^{6+}$ , 1434.23  $[\text{M}+5\text{H}]^{5+}$ , 1792.27  $[\text{M}+4\text{H}]^{4+}$ . Deconvolution mass, 7165.9.

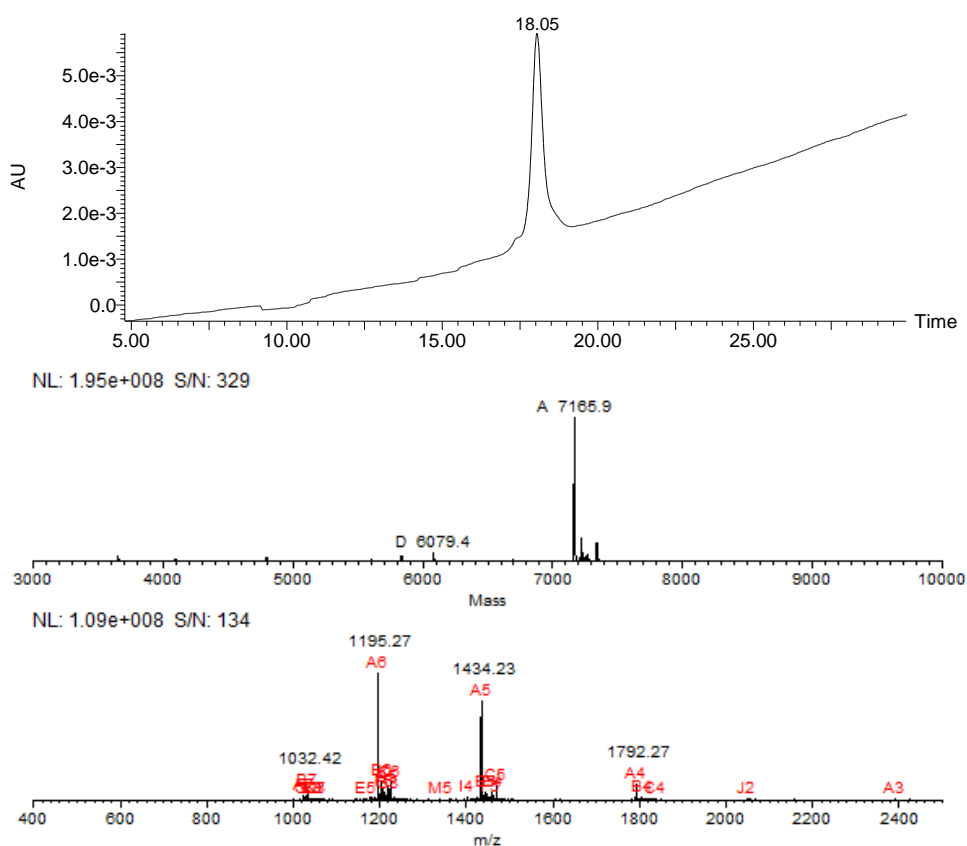

Figure S15. HPLC and ESI-MS profiles of biotinylated glycopeptide **19**

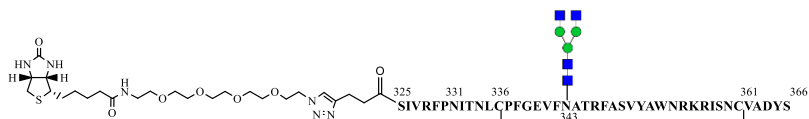

### Biotinylated glycopeptide **20**

*Biotinylated glycopeptide 20 (Biotin-42-mer-N343-GN-G0)*. Glycopeptide **13** (0.20 mg, 0.032  $\mu\text{mol}$ ) was converted to 0.18 mg biotinylated glycopeptide **20** (yield, 83%). Analytical RP-HPLC,  $t_R = 18.20$  min. ESI-MS: calcd.,  $M = 6693.41$  (average isotopes); found, 1116.73  $[\text{M}+6\text{H}]^{6+}$ , 1339.80  $[\text{M}+5\text{H}]^{5+}$ , 1674.49  $[\text{M}+4\text{H}]^{4+}$ , 2232.00  $[\text{M}+3\text{H}]^{3+}$ . Deconvolution mass, 6694.2.

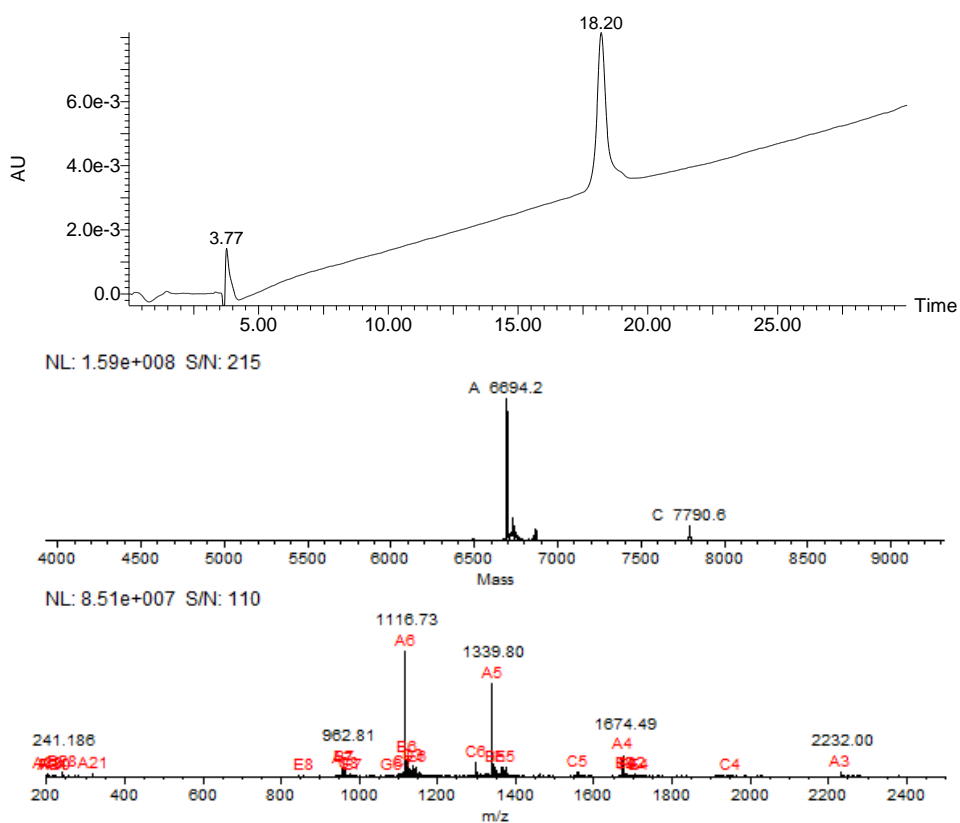

Figure S16. HPLC and ESI-MS profiles of biotinylated glycopeptide **20**



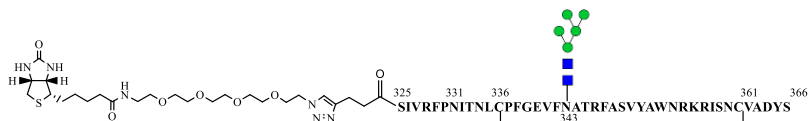

### Biotinylated glycopeptide **21**

*Biotinylated glycopeptide 21* (Biotin-42-mer-N343-GN-Man5). Glycopeptide **14** (0.20 mg, 0.033  $\mu\text{mol}$ ) was converted to 0.17 mg biotinylated glycopeptide **21** (yield, 79%). Analytical RP-HPLC,  $t_R = 18.15$  min. ESI-MS: calcd.,  $M = 6611.30$  (average isotopes); found, 1103.05  $[\text{M}+6\text{H}]^{6+}$ , 1323.44  $[\text{M}+5\text{H}]^{5+}$ , 1653.83  $[\text{M}+4\text{H}]^{4+}$ , 2205.08  $[\text{M}+3\text{H}]^{3+}$ . Deconvolution mass, 6612.3.

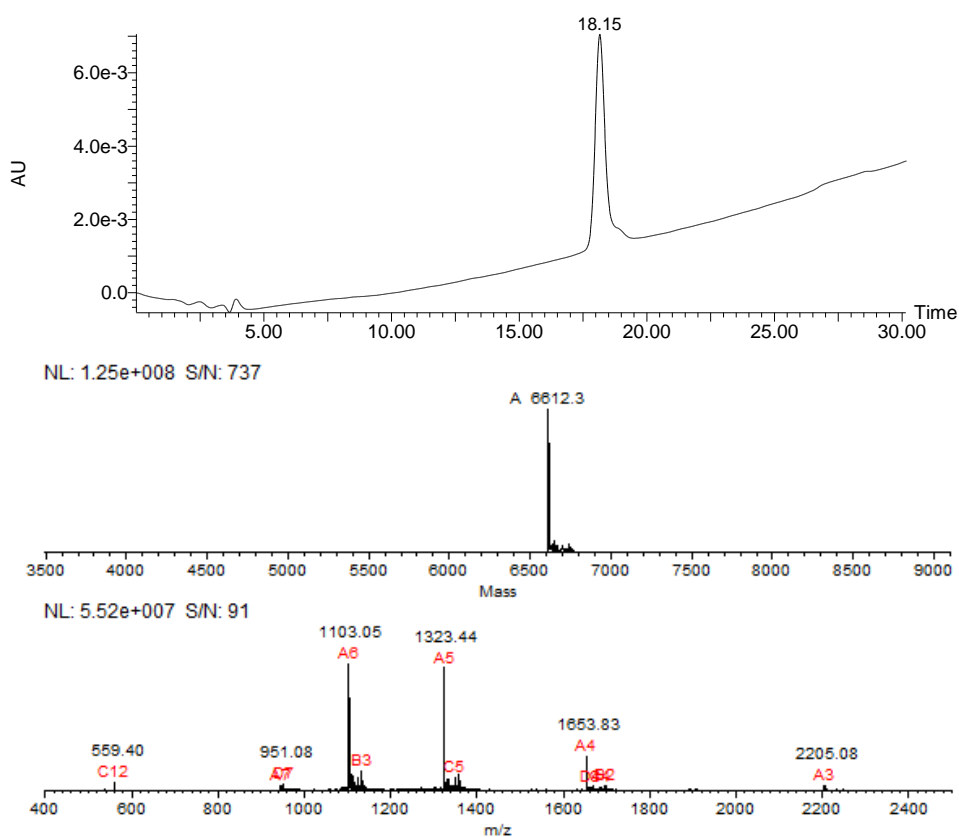

Figure S17. HPLC and ESI-MS profiles of biotinylated glycopeptide **21**

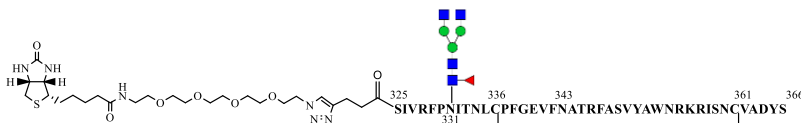

### Biotinylated glycopeptide **22**

Biotinylated glycopeptide **22** (Biotin-42-mer-N331-GN-F-G0). Glycopeptide **15** (0.20 mg, 0.031  $\mu\text{mol}$ ) was converted to 0.17 mg biotinylated glycopeptide **22** (yield, 79%). Analytical RP-HPLC,  $t_R = 18.15$  min. ESI-MS: calcd.,  $M = 6839.55$  (average isotopes); found, 1141.24  $[\text{M}+6\text{H}]^{6+}$ , 1369.12  $[\text{M}+5\text{H}]^{5+}$ , 1711.24  $[\text{M}+4\text{H}]^{4+}$ . Deconvolution mass, 6840.6.

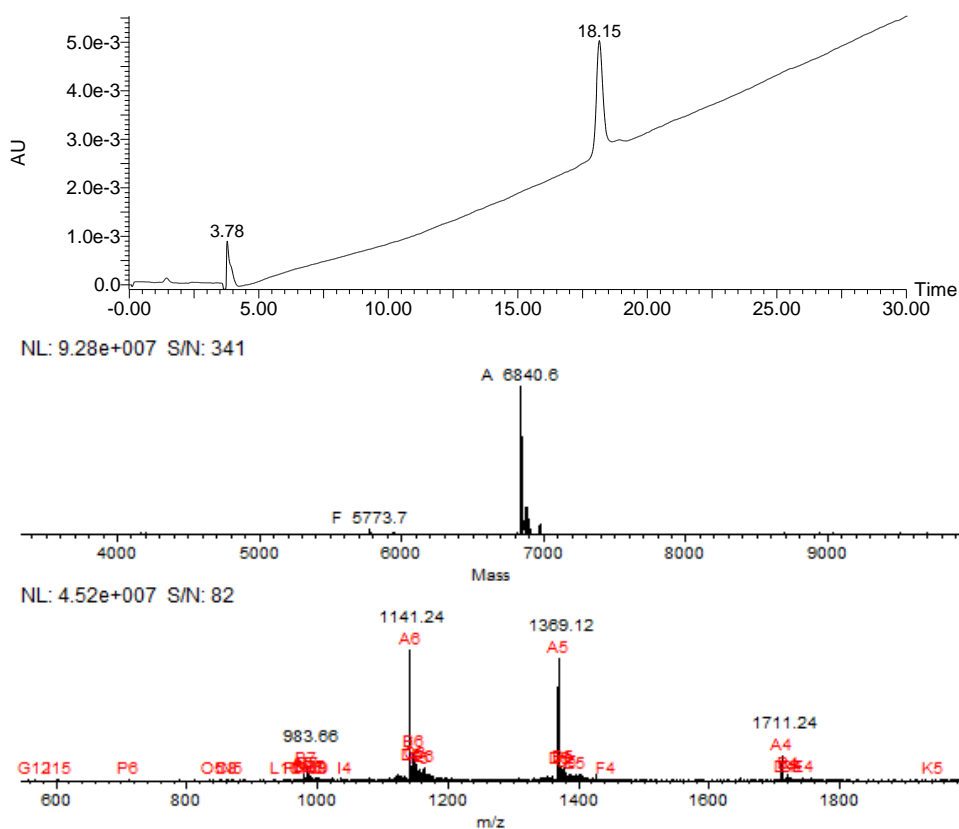

Figure S18. HPLC and ESI-MS profiles of biotinylated glycopeptide **22**

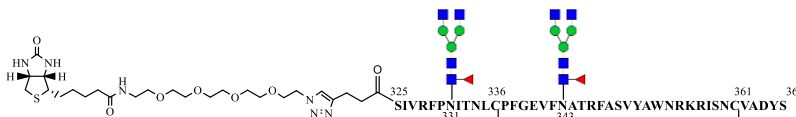

### Biotinylated glycopeptide **23**

Biotinylated glycopeptide **23** (Biotin-42-mer-N331-GNF-G0, N343-GNF-G0). Glycopeptide **16** (0.20 mg, 0.026  $\mu\text{mol}$ ) was converted to 0.20 mg biotinylated glycopeptide **23** (yield, 94%). Analytical RP-HPLC,  $t_R = 17.52$  min. ESI-MS: calcd.,  $M = 8284.89$  (average isotopes); found, 1184.90  $[\text{M}+7\text{H}]^{7+}$ , 1382.09  $[\text{M}+5\text{H}]^{5+}$ , 1658.20  $[\text{M}+5\text{H}]^{5+}$ . Deconvolution mass, 8286.5.

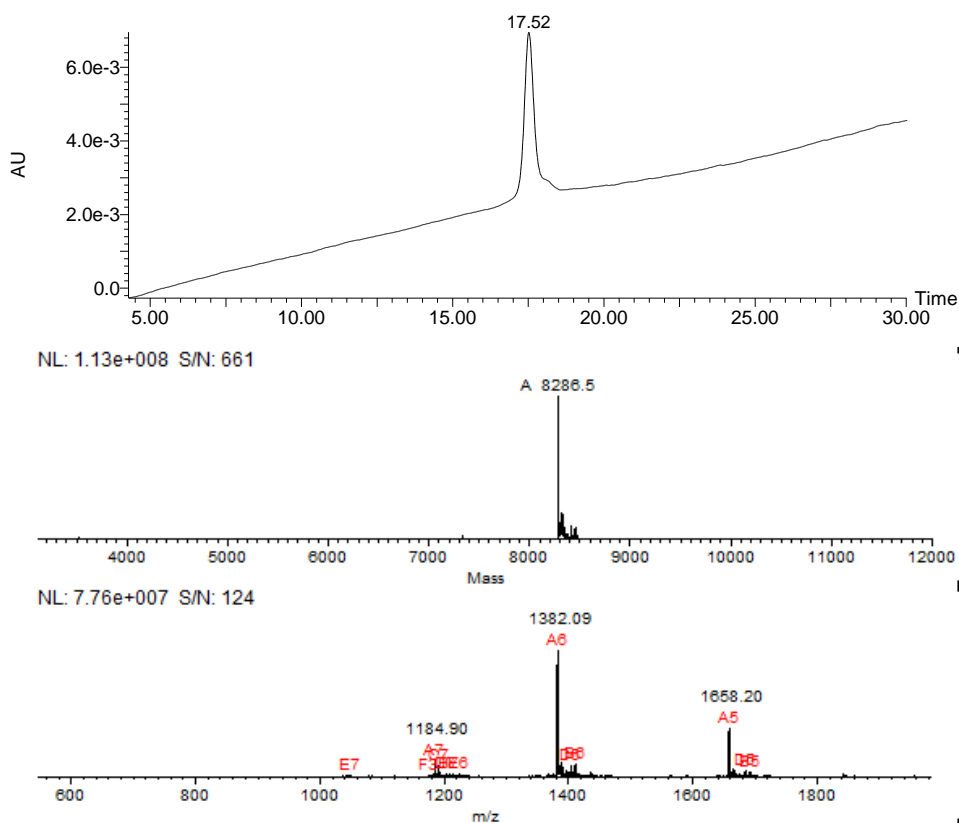

Figure S19. HPLC and ESI-MS profiles of biotinylated glycopeptide **23**

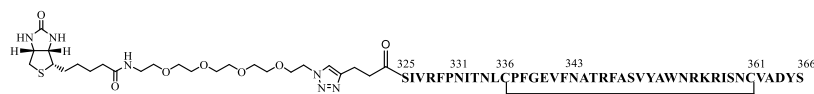

### Biotinylated glycopeptide **24**

*Biotinylated glycopeptide 24 (Biotin-42-mer-standard)*. Peptide **4** (0.20 mg, 0.041  $\mu\text{mol}$ ) was converted to 0.16 mg biotinylated peptide **24** (yield, 73%). Analytical RP-HPLC,  $t_R = 18.88$  min. ESI-MS: calcd.,  $M = 5394.21$  (average isotopes); found, 900.18  $[\text{M}+6\text{H}]^{6+}$ , 1080.04  $[\text{M}+5\text{H}]^{5+}$ , 1349.57  $[\text{M}+4\text{H}]^{4+}$ , 1799.15  $[\text{M}+3\text{H}]^{3+}$ . Deconvolution mass, 5395.1.

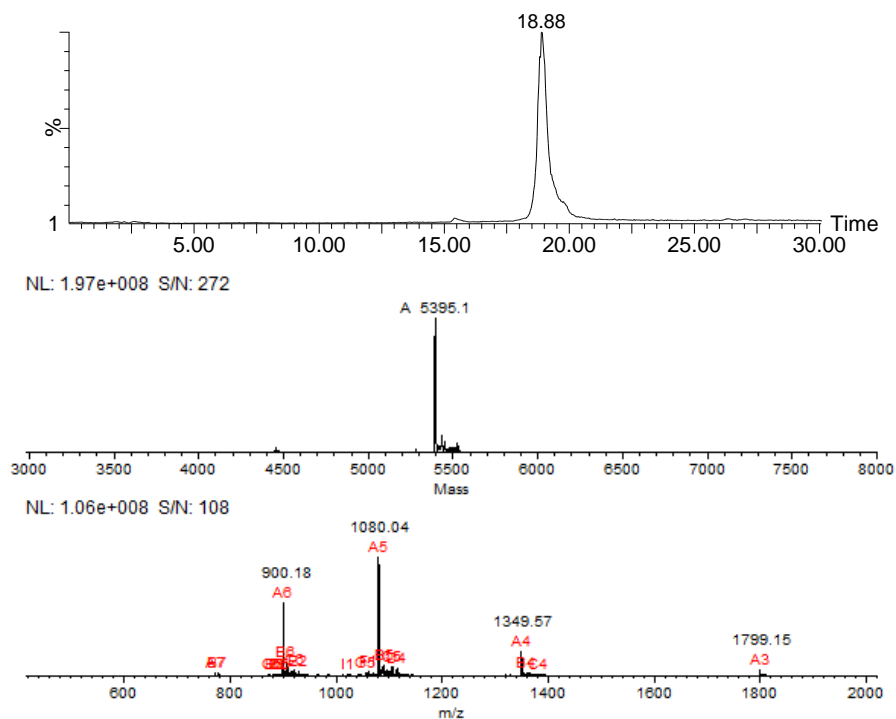

Figure S20. HPLC and ESI-MS profiles of biotinylated glycopeptide **24**

## Expression and Characterization of Monoclonal Antibody S309

**Gene construct** – DNA construct of monoclonal antibody S309 was designed using the Fab sequence of S309<sup>5</sup> (Protein Data Bank accession code – 6WS6) and the heavy chain constant domains of human IgG1 (Uniprot: P01857) with a M428L/N434S double mutation<sup>5</sup>. Synthetic genes of the antibody heavy chain and light chain, codon-optimized and individually cloned into pcDNA3.1 vector using NheI/XhoI sites, were procured from GenScript Biotech Corporation.

**Antibody expression and characterization** – Recombinant S309 antibody was transiently expressed in HEK293T cells using the outlined procedure. Briefly, HEK293T cells were seeded at a density of  $1 \times 10^6$ /mL in serum-free FreeStyle™ F17 Expression Medium (Thermo Fisher Scientific) and cultured at 37°C, 7% CO<sub>2</sub>, 150 rpm. After 20 – 24 h, co-transfection was performed with 1.5 µg/mL each of the heavy chain and light chain plasmids and 9 µg/mL of the transfection reagent, polyethylenimine (PEI). 2.2 mM of valproic acid was supplemented a day post-transfection. The culture was harvested three days post-transfection and the supernatant was purified using Protein A chromatography. The purified antibody was characterized using non-reduced and reduced gel electrophoresis (Figure S21) and mass spectrometric (MS) analysis (Figure S22). The antibody was treated with IdeS protease (0.02 mg/ml) in PBS at 37°C for 15 min to generate Fab dimer and Fc monomer fragments. Liquid chromatography (LC)-MS analysis of reduced antibodies was performed on a Thermo Scientific Exactive™ Plus Orbitrap mass spectrometer on a Waters XBridge™ BEH300 C4 column (3.5 µm, 2.1 x 50 mm) using a 6-min linear gradient of 25 - 35% acetonitrile containing 0.1% formic acid at a flow rate of 0.4 mL/min. MS raw data was deconvoluted using MagTran (Amgen).

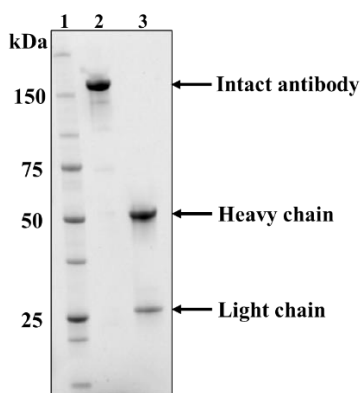

Figure S21. SDS-PAGE analysis of recombinant S309 antibody. Lane 1 – protein ladder showing protein standards of specified sizes, Lane 2 – purified intact S309 antibody run under non-reducing conditions, Lane 3 – reduced S309 antibody showing antibody heavy chain and light chain.

A)

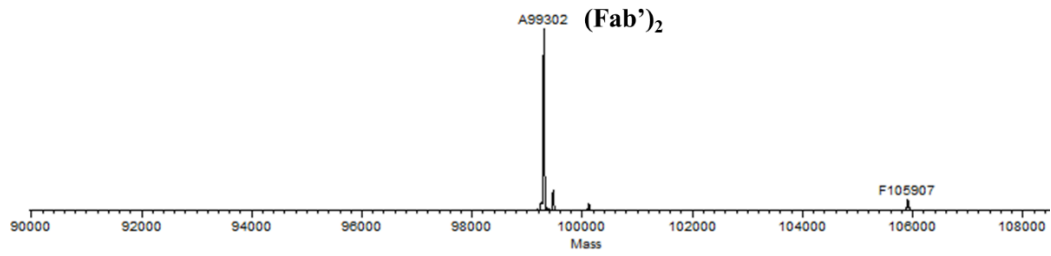

B)

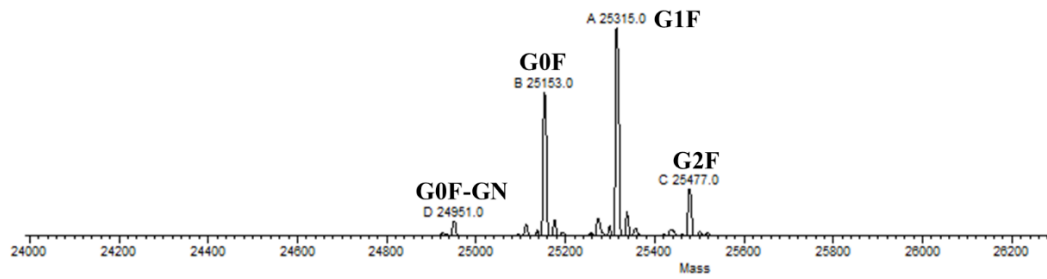

Figure S22. LC-MS analysis of IdeS-treated S309 antibody showing A) Fab dimer and B) Fc monomer

### **Enzyme-linked immunosorbant assay (ELISA)**

The high-binding Ultra Cruz 96-well plates (Santa Cruz Biotech) were firstly coated with 100 ng of the SARS-CoV-2 RBD derived (glyco)peptides or SARS-CoV-2 spike protein trimer antigen in 100  $\mu$ L of PBS buffer at 4  $^{\circ}$ C overnight. Afterwards, the plates were washed with PBS/0.05% Tween-20 (PBS-T) three times and then saturated with 2% (w/v%) sodium casein under incubation at 37  $^{\circ}$ C for 1 h. The plates were again washed with PBS-T for three times. Next, the S309 mAb with various concentrations (1  $\mu$ g/mL to 0.5 ng/mL with a serial of 2-fold dilutions) was applied to the assay plate. The binding of the mAb was proceeded at room temperature for 1 h and then washed by the PBS-T solution for 4 times. Subsequently, 100  $\mu$ L of the 1:10,000 diluted HRP-labeled goat anti-human IgG antibody (KPL) was applied to the well plate. The binding occurred at room temperature for 30 min, followed by extensive washes with PBS-T solution for 5 times. Finally, 100  $\mu$ L of the TMB 2-component microwell peroxidase substrates (SeraCare) was added to each well. The color was developed in dark at room temperature for 30 min, and then quenched with 100  $\mu$ L of 1 M  $H_3PO_4$  solution. Absorbance values were read by subtracting the optical density (OD) at 450 nm by the OD at 550 nm.

### **Surface Plasmon Resonance (SPR) Measurements.**

SPR measurements were performed on a Biacore T200 instrument (GE Healthcare) at 25 °C. Approximately 7000 resonance units (RU) of neutravidin was immobilized on a CM5 sensor chip in a sodium acetate buffer (50 µg/mL, pH 4.0), using the amine coupling kit provided by the manufacturer. Biotinylated SARS-CoV-2 spike protein (glyco)peptides were captured on neutravidin-coated CM5 sensor chips in HBS-P buffer (10mM HEPES, 150 mM NaCl, P20 surfactant 0.05% v/v, pH 7.4) until approximately 2000 response unit (RU) was achieved. Recombinant human CLEC4G (Fc tag, Acro Biosystems) were prepared at determined concentrations (2× serial dilutions from 7.8 nM to 2 µM) in HBS-P running buffer (10 mM HEPES, 150 mM NaCl, 500 µM CaCl<sub>2</sub>, P20 surfactant 0.05% v/v, pH 7.4) while a 10 mM EDTA-NaOH was used as regeneration buffer. A typical binding curve was obtained by flowing *h*CLEC4G sample at 10 µL/s for 180 s association and then flowing running buffer for 240 s dissociation, followed by 60 s regeneration buffer at 10 µL/s. The kinetic constants are obtained by fitting the steady-state RU using Biacore T200 evaluation software.



## References

1. C. Li, S. Zhu, C. Ma and L.-X. Wang, *J. Am. Chem. Soc.*, 2017, **139**, 15074-15087.
2. C. Toonstra, M. N. Amin and L. X. Wang, *J Org. Chem.*, 2016, **81**, 6176-6185.
3. M. Noguchi, T. Tanaka, H. Gyakushi, A. Kobayashi and S. Shoda, *J Org. Chem.*, 2009, **74**, 2210-2212.
4. B. Sun, W. Bao, X. Tian, M. Li, H. Liu, J. Dong and W. Huang, *Carbohydr. Res.*, 2014, **396**, 62-69.
5. D. Pinto, Y. J. Park, M. Beltramello, A. C. Walls, M. A. Tortorici, S. Bianchi, S. Jaconi, K. Culap, F. Zatta, A. De Marco, A. Peter, B. Guarino, R. Spreafico, E. Cameroni, J. B. Case, R. E. Chen, C. Havenar-Daughton, G. Snell, A. Telenti, H. W. Virgin, A. Lanzavecchia, M. S. Diamond, K. Fink, D. Veessler and D. Corti, *Nature* 2020, **583**, 290-295.
